# Supplementary material for: Abnormal RNA stability in amyotrophic lateral sclerosis
Source: PubMed Central journal article supplement (PMC6054632; doi:10.1038/s41467-018-05049-z), 2018-07-20
Supplement: 41467_2018_5049_MOESM1_ESM.pdf [file 41467_2018_5049_MOESM1_ESM.pdf]

Supplementary information for

## **Abnormal RNA stability in amyotrophic lateral sclerosis**

**Author list:** Tank EM<sup>1,§</sup>, Figueroa-Romero C<sup>1,§</sup>, Hinder LM<sup>1</sup>, Bedi K<sup>2</sup>, Archbold HC<sup>1</sup>, Li X<sup>1</sup>, Weskamp K<sup>1</sup>, Safren N<sup>1</sup>, Paez-Colasante X<sup>1</sup>, Pacut C<sup>1</sup>, Thumma S<sup>1</sup>, Paulsen MT<sup>2</sup>, Guo K<sup>3</sup>, Hur J<sup>3</sup>, Ljungman M<sup>2,4</sup>, Feldman EL<sup>1,4,5</sup>, and Barmada SJ<sup>1,4,5,\*</sup>

§ Authors contributed equally to the work

\* To whom correspondence should be addressed: sbarmada@umich.edu

### **Affiliations:**

<sup>1</sup>Department of Neurology, University of Michigan Medical School, Ann Arbor, MI 48109;

<sup>2</sup>Department of Radiation Oncology, University of Michigan Medical School, Ann Arbor, MI 48109;

<sup>3</sup>Department of Biomedical Sciences, School of Medicine and Health Sciences, University of North Dakota, Grand Forks, ND 58202;

<sup>4</sup>Cellular & Molecular Biology Program, University of Michigan Medical School, Ann Arbor, MI 48109;

<sup>5</sup>Neuroscience Graduate Program, University of Michigan Medical School, Ann Arbor, MI 48109.

## SUPPLEMENTARY METHODS

### RNA extraction and quantitative PCR from brain tissue

90-100 mg total RNA from patient tissue (Supplementary Table 3) was extracted using the RNeasy Lipid Tissue Mini Kit (Qiagen) following the manufacture's protocol. cDNA was synthesized from 1 µg of total RNA using the iScript cDNA Synthesis Kit (Bio-Rad) according to the manufacturer's instructions. The reactions were incubated at 25°C for 5 min, 42°C for 30 min, 85°C for 5 min, and held at 4°C. For quantitative real-time PCR, we used the Step One Plus Realtime PCR system (Applied Biosystems). All reactions were performed using SYBR Green (Applied Biosystems), 200 nM primers, and 0.5 µl cDNA. The thermal cycling conditions included 95°C for 10 min, 40 cycles at 95°C for 15 s, and 60°C for 1 min. Experiments were performed in triplicate for each data point. Relative gene expression was calculated using the comparative Ct ( $^{2^{-\Delta\Delta Ct}}$ ) method. Quantitative normalization of cDNA in each sample was performed using GAPDH as an internal reference. GAPDH was one of the housekeeping genes whose synthesis (measured by Bru-seq) and stability (detected by BruChase-seq) did not appreciably change in C9ALS and sALS iPSCs, and was therefore chosen as a reference for quantitative RT-PCR. Although the use of GAPDH as a reference gene is limited by its variability between different tissue types of the same organism<sup>1</sup>, here we were applying it as a reference for tissues of the same type, and cells cultured under identical conditions. Primer sequences for PCR and qPCR were as follows:

| Target   | Forward primer (5'-3')      | Reverse primer (5'-3')     |
|----------|-----------------------------|----------------------------|
| COX5b    | AGG ACA ATA CCA GCG TCG TC  | TTG TAA TGG GCT CCA CAG CG |
| COX6C-X1 | CTG CCT CGG ATT TAG TCG TGA | GCG TGA GAG AGT AGA TGC GG |

|         |                             |                             |
|---------|-----------------------------|-----------------------------|
| NDUFA13 | GGA CCG GAA GTG TGG GAT AC  | TCC GTT TGT AGT CGA TGG GC  |
| NDUFA1  | GGT AAC GGG GCA GAG ATG TG  | GGA TGT ACG CAG TAG CCA GT  |
| RPL28   | TCT CGC TCT TGT CGT GTC TG  | ATG CCC CGG ATA ATC CTC TG  |
| RPL38   | GGA AAC GGA AGT CTC GTT CTT | TCA CCC ACG TAT CAC CCT AGA |
| RPS18   | CTG GAC AAC AAG CTC CGT GA  | AGA AGT GAC GCA GCC CTC TA  |
| GAPDH   | AAG GTG AAG GTC GGA GTC AA  | AAT GAA GGG GTCA TTG ATG G  |

### RNA binding protein motif analysis

Within the 3'UTR transcripts showing a greater/less than 1.5-fold change in the stability, we searched for enrichment of sequence motifs using AME, part of the MEME suite of tools (v 4.1.0)<sup>2</sup>. A total of 24 RNA binding proteins and their corresponding sequence motifs were selected based upon their presence in stress granules, known recognition motifs and genetic linkage to ALS or FTD:

| RBP        | Motif    | Criteria* | References                                                                                                                                                                             |
|------------|----------|-----------|----------------------------------------------------------------------------------------------------------------------------------------------------------------------------------------|
| TDP43      | UGUGU    | A, B, C   | Colombrita C et al. (2009). <i>J Neurochem</i> , 111(4), 1051<br>Polymenidou M et al. (2011) <i>Nat Neurosci</i> , 14, 459<br>Neumann M et al. (2006). <i>Science</i> , 314(5796), 130 |
| FUS        | GUGGU    | A, B, C   | Baron D et al. (2013). <i>Mol Neurodegen</i> , 8(1), 30<br>Lagier-Tourenne C et al. <i>Nat Neurosci</i> , 15(11), 1488<br>Vance C et al. (2009). <i>Science</i> , 323(5918), 1208      |
| TIA1       | UUUUU    | A, B, C   | Dember LM et al. (1996). <i>J Biol Chem</i> , 271;(5):2783<br>Jain M et al. (2016) <i>Cell</i> , 164; 487<br>Mackenzie IR et al. (2017) <i>Neuron</i> , 95(4):808                      |
| hnRNPA2/B1 | GGUAGUAG | A, B, C   | Huelga SC et al. (2012) <i>Cell Rep</i> . 1(2):167<br>Jain M et al. (2016) <i>Cell</i> , 164; 487<br>Kim HJ et al. (2013) <i>Nature</i> , 495(7442), 467                               |
| hnRNPA1    | UAGGRW   | A, B, C   | Burd CG and Dreyfuss G (1994) <i>EMBO J</i> . 113;(5):1197<br>Jain M et al. (2016) <i>Cell</i> , 164; 487–498<br>Kim HJ et al. (2013) <i>Nature</i> , 495(7442), 467                   |
| FMR1       | DWGG     | A, B, C   | Chen L et al. (2003) <i>Neuroscience</i> 120;(4):1005<br>Jain M et al. (2016) <i>Cell</i> , 164; 487<br>He F et al. (2014) <i>Hum Mol Genet</i> 23(19):5036                            |
| RBMS1      | DAUAKMS  | A, B, C   | Ray D et al. (2013) <i>Nature</i> 11;499(7457):172<br>Jain M et al. (2016) <i>Cell</i> , 164; 487<br>Landers et al. (2009) <i>PNAS USA</i> 109(22):9004                                |
| SRSF1      | RGAAGRRY | A, B, C   | Tacke R and Manley JL. (1995) <i>EMBO J</i> . 14;(14):3540<br>Jain M et al. (2016) <i>Cell</i> , 164; 487<br>Hautbergue GM et al. (2017) <i>Nat Comm</i> 8:16063                       |
| G3BP2      | WAGGAU   | A, B      | Ray D et al. (2013) <i>Nature</i> 11;499(7457):172<br>Jain M et al. (2016) <i>Cell</i> , 164; 487–498                                                                                  |

|               |         |      |                                                                                                 |
|---------------|---------|------|-------------------------------------------------------------------------------------------------|
| HuR           | UUUDUUU | A, B | Ray D et al. (2013) Nature 11;499(7457):172<br>Jain M et al. (2016) Cell, 164; 487–498          |
| EIF2 $\alpha$ | GCAUG   | A, B | Ray D et al. (2013) Nature 11;499(7457):172<br>Jain M et al. (2016) Cell, 164; 487–498          |
| hnRNPK        | CCAWMCC | A, B | Ray D et al. (2013) Nature 11;499(7457):172<br>Jain M et al. (2016) Cell, 164; 487–498          |
| ELAVL1        | UUUGUUU | A, B | Ray D et al. (2013) Nature 11;499(7457):172<br>Jain M et al. (2016) Cell, 164; 487–498          |
| MBNL1         | YGCY    | A, B | Goers ES et al. (2016) Nucleic Acids Res. 38;(7)2467<br>Jain M et al. (2016) Cell, 164; 487–498 |
| hnRNPA B      | RGWYAR  | A, B | Ray D et al. (2013) Nature 11;499(7457):172<br>Jain M et al. (2016) Cell, 164; 487–498          |
| FXR1          | AYGRMR  | A, B | Ray D et al. (2013) Nature 11;499(7457):172<br>Jain M et al. (2016) Cell, 164; 487–498          |
| FXR2          | GACRRR  | A, B | Ray D et al. (2013) Nature 11;499(7457):172<br>Jain M et al. (2016) Cell, 164; 487–498          |
| PABPC1        | AAAAA   | A, B | Görlach M et al. (1994) Exp Cell Res. 211;(2)400<br>Jain M et al. (2016) Cell, 164; 487–498     |
| PABPC4        | VVAAADV | A, B | Ray D et al. (2013) Nature 11;499(7457):172<br>Jain M et al. (2016) Cell, 164; 487–498          |
| PCBP2         | YYYYHCH | A, B | Ray D et al. (2013) Nature 11;499(7457):172<br>Jain M et al. (2016) Cell, 164; 487–498          |
| RBM42         | VACUAHD | A, B | Ray D et al. (2013) Nature 11;499(7457):172<br>Jain M et al. (2016) Cell, 164; 487–498          |
| hnRNPH2       | GGGAGGG | A, B | Ray D et al. (2013) Nature 11;499(7457):172<br>Jain M et al. (2016) Cell, 164; 487–498          |
| ZNF638        | KUKSKD  | A, B | Ray D et al. (2013) Nature 11;499(7457):172<br>Jain M et al. (2016) Cell, 164; 487–498          |
| Syncrin       | MAAAWW  | A, B | Ray D et al. (2013) Nature 11;499(7457):172<br>Jain M et al. (2016) Cell, 164; 487–498          |

\*Criteria: A- component of stress granules; B- known sequence motif; C- associated with ALS or FTD.

### Mitochondrial morphology in fixed cells

Patient-derived fibroblast were plated in at a density of 10,000 cells/well in a 96-well plate (Falcon/Corning) in 100  $\mu$ l of FM and incubated overnight at 37°C in 5% CO<sub>2</sub>. Cells were fixed with 2% paraformaldehyde (Sigma-Aldrich) for 10 min at room temperature (RT).

Immunohistochemistry was performed using mouse monoclonal anti-mitochondria, surface of intact mitochondria primary antibody, clone 113-1 (Millipore Sigma) diluted to 1:100 in antibody buffer (1X PBS pH 7.4, 0.1% Triton X-100, 1% BSA) overnight at 4°C, followed by secondary incubation with goat anti-mouse Alexa Fluor<sup>®</sup> 488 antibody at 1:2000 dilution. After removal of secondary antibody, the cells were incubated with monoclonal Cy3 conjugated anti-vimentin

antibody (Sigma-Aldrich) at 1:1000 dilution in antibody buffer for 1 h at RT. The cells were viewed on a Nikon TiE/B inverted fluorescence microscope with an Andor Zyla 4.2p sCOMS camera. Fifty cells/line were highlighted for quantitation by a blinded researcher using ImageJ software. Mitochondrial granularity was estimated on a per-cell basis by determining the coefficient of variation (CV) for each cell, calculated as the ratio of standard deviation in fluorescence intensity to mean fluorescence intensity.

### **Immunoblotting**

iPSCs were rinsed once with PBS, then lysed in RIPA buffer (25mM Tris, 150 mM NaCl, 0.1% SDS, 0.5% sodium deoxycholate, 1% Triton X-100) with protease inhibitors (Roche). Lysates were sonicated with a probe sonicator at 30% power for 10 s, and incubated on ice for 30 min prior to centrifugation at 16,000 x g to remove debris. Protein content of the supernatants was determined by the Pierce 660nm Protein Assay. Samples normalized for protein content were run on 4-20% gradient SDS polyacrylamide gels. Proteins were detected using primary antibodies against RPS18 (1:1000, Abcam ab91293), COQ7 (1:500, Proteintech 15083-1-AP), and GAPDH (1:1000, Millipore MAB374), and IR dye-conjugated secondary antibodies (1:10,000, LI-COR Biosciences), imaged on a LI-COR Odyssey, and quantified using ImageStudioLite (LI-COR Biosciences). Plots were created using GraphPad Prism.

### **Immunocytochemistry**

For detection of GR and mitochondria, iPSCs were rinsed twice in PBS and fixed in 4% paraformaldehyde for 10 min. Following 2 more rinses in PBS, the cells were permeabilized with 0.1% Triton X-100 in PBS for 20 min at RT, equilibrated with 10 mM glycine in PBS for 10 min at RT, then blocked in 0.1% Triton X-100, 3% BSA and 0.2% goat serum in PBS for 1 h at RT. Primary antibodies against GR (1:500, rabbit polyclonal, ref. 3) or surface of intact mitochondria (1:100, mouse monoclonal clone 113-1, Millipore Sigma) were added directly to the block before

incubating overnight at 4°C. The cells were rinsed twice quickly and 3 times for 10 min each with PBS, then placed back in block solution containing the appropriate secondary antibodies (goat anti-rabbit Cy5, Jackson ImmunoResearch, (115-175-144), Goat whole IgG (H+L) and Alexa Fluor® 488 goat anti-mouse antibody, Life Technologies) at a dilution of 1:250. The cells were rinsed twice quickly in PBS, and 3 times for 10 min each in PBS containing Hoescht 33342 dye (Invitrogen) at 100 nM, then twice more in PBS before imaging using a Nikon TiE/B inverted fluorescence microscope with an Andor Zyla 4.2p sCOMS camera.

### **Non-radioactive assessment of protein synthesis using SUnSET**

Global translation in fibroblasts was assessed by SUnSET as previously reported<sup>4</sup>. Briefly, patient derived fibroblasts were plated at  $2 \times 10^5$  cells/well in 35 mm tissue culture dishes (Falcon/Corning) and incubated overnight at 37°C in 5% CO<sub>2</sub>. The cells were incubated for 20 min with 1 µg/µl puromycin (Sigma-Aldrich) in preconditioned media, washed with 1X PBS, trypsinized with 0.25% trypsin-EDTA, and transferred to a 96-well round bottom plate (Corning). Intracellular staining was performed following the manufacture's protocol (eBioscience) and stained with AlexaFluor® 647 anti-puromycin antibody (Millipore Sigma) or AlexaFluor® 647 mouse IgG isotope control clone MOPC-21 (Biolegend) for 1 h at RT. The cells were resuspended in 100 µl of flow cytometry staining buffer (1X PBS, 2% FBS, 0.1% sodium azide) and flow cytometry was performed with the assistance of the University of Michigan Flow Cytometry Core using a BD Aria3 cytometer (BD Biosciences, San Jose, CA, USA). Compensations were determined using single color stained and unstained cells. Median fluorescence intensity was determined for both control and puromycin-stained samples, and expressed as fold change versus control<sup>4</sup>.

## SUPPLEMENTARY REFERENCES

1. Kozera, B. & Rapacz, M. Reference genes in real-time PCR. *J Appl Genetics* **54**, 391–406 (2013).
2. Bailey, T. L. *et al.* MEME SUITE: tools for motif discovery and searching. *Nucleic Acids Res* **37**, W202–8 (2009).
3. Flores, B. N. *et al.* Distinct C9orf72-Associated Dipeptide Repeat Structures Correlate with Neuronal Toxicity. *PLoS ONE* **11**, e0165084–18 (2016).
4. Schmidt, E. K., Clavarino, G., Ceppi, M. & Pierre, P. SUnSET, a nonradioactive method to monitor protein synthesis. *Nat Meth* **6**, 275–277 (2009).
5. Müller, F.-J. *et al.* A bioinformatic assay for pluripotency in human cells. *Nat Meth* **8**, 315–317 (2011).

# Supplementary Table 1

|         | ID    | Bru-Seq | Seahorse | Passage | Age | Sex | Duration (y) | Onset    |
|---------|-------|---------|----------|---------|-----|-----|--------------|----------|
| Control | C1*   | ✓       | ✓        | 4       | 58  | M   | –            | –        |
|         | C2    | ✓       | ✓        | 4       | 48  | M   | –            | –        |
|         | C3    | ✓       | ✓        | 4       | 48  | M   | –            | –        |
|         | C4*   | ✓       | ✓        | 4       | 52  | F   | –            | –        |
|         | C5    | ✓       | ✓        | 4       | 66  | M   | –            | –        |
|         | C6    |         | ✓        | 2       | 61  | M   | –            | –        |
|         | C7    |         | ✓        | 2       | 80  | M   | –            | –        |
|         | C8    |         | ✓        | 2       | 76  | M   | –            | –        |
| C9ALS   | C9A1  | ✓       | ✓        | 4       | 65  | M   | 1.6          | Bulbar   |
|         | C9A2* | ✓       |          | 4       | 49  | M   | 1.7          | Lumbar   |
|         | C9A3  | ✓       | ✓        | 4       | 56  | M   | 1.8          | Cervical |
|         | C9A4* | ✓       |          | 4       | 52  | M   | 1.9          | Lumbar   |
|         | C9A5  |         | ✓        | 2       | 52  | M   | 1.3          | Cervical |
|         | C9A6  |         | ✓        | 2       | 47  | M   | 1.3          | Cervical |
|         | C9A7  |         | ✓        | 2       | 60  | M   | 0.9          | Cervical |
| sALS    | SA1   | ✓       | ✓        | 4       | 52  | M   | 2.5          | Lumbar   |
|         | SA2*  | ✓       | ✓        | 4       | 52  | M   | 1.4          | Lumbar   |
|         | SA3   | ✓       | ✓        | 4       | 52  | M   | 3.7          | Cervical |
|         | SA4*  | ✓       | ✓        | 4       | 65  | F   | 2.2          | Lumbar   |
|         | SA5   | ✓       | ✓        | 4       | 49  | M   | 4.9          | Cervical |
|         | SA6   |         | ✓        | 3       | 80  | M   | 2.6          | Lumbar   |
|         | SA7   |         | ✓        | 2       | 77  | M   | 3.2          | Lumbar   |
|         | SA8   |         | ✓        | 2       | 48  | M   | 1.7          | Lumbar   |

**Supplementary table 1: ALS patient-derived cell lines.** Fibroblasts were obtained from the University of Michigan ALS Repository through approved protocols, as described in the Methods section. A subset of these (marked with an \*) were reprogrammed into iPSCs for subsequent studies. “Duration” refers to the time in years (y) between onset and biopsy, and “Onset” the site of disease onset



# Supplementary Table 2

|       | Gene   | FC    | p                                      | Description                                      |
|-------|--------|-------|----------------------------------------|--------------------------------------------------|
| C9ALS | ASPM   | 0.44  | 0.003                                  | abnormal spindle microtubule assembly            |
|       | DACT1  | 0.45  | 0.081                                  | dishevelled binding antagonist of beta catenin 1 |
|       | ZFPM2  | 0.49  | 0.076                                  | zinc finger protein, FOG family member 2         |
|       | FOS    | 3.52  | 4.9x10 <sup>-6</sup>                   | Fos AP-1 transcription factor subunit            |
|       | WISP2  | 4.11  | 1.0x10 <sup>-5</sup>                   | WNT1 inducible signaling pathway protein 2       |
|       | IGFBP5 | 4.20  | 1.1x10 <sup>-5</sup>                   | insulin like growth factor binding protein 5     |
|       | CYP7B1 | 3.14  | 1.4x10 <sup>-5</sup>                   | cytochrome P450 family 7 subfamily B-1           |
| sALS  | SFRP2  | 0.18  | 3.6x10 <sup>-10</sup>                  | secreted frizzled related protein 2              |
|       | FNDC1  | 0.27  | 3.6x10 <sup>-6</sup>                   | fibronectin type III domain containing 1         |
|       | DACT1  | 0.35  | 5.0x10 <sup>-4</sup>                   | dishevelled binding antagonist of beta catenin 1 |
|       | MKX    | 0.43  | 6.3x10 <sup>-4</sup>                   | mohawk homeobox                                  |
|       | TM4SF1 | 3.61  | 5.7x10 <sup>-7</sup>                   | transmembrane 4 L six family member 1            |
|       | MMP1   | 2.33  | 0.003                                  | matrix metalloproteinase 1                       |
|       | GPRC5A | 2.46  | 0.023                                  | G protein-coupled receptor class C group 5-A     |
| NR4A2 | 1.97   | 0.023 | nuclear receptor subfamily 4 group A-2 |                                                  |

**Supplementary table 2: Transcripts demonstrating altered synthesis in C9ALS and sALS fibroblasts.** Fold change (FC) and adjusted p value determined using DESeq2

# Supplementary Table 3

|              | ID   | Age | Sex | PMI | Tissues                                  |
|--------------|------|-----|-----|-----|------------------------------------------|
| sporadic ALS | 1620 | 67  | M   | 5   | Cervical cord, frontal cortex            |
|              | 1705 | 77  | F   | 6   | Cervical cord, frontal cortex            |
|              | 1669 | 66  | F   | 9   | Cervical cord, frontal cortex            |
| C9ALS        | 1666 | 56  | F   | 11  | Cervical cord, temporal cortex           |
|              | 1729 | 59  | F   | 17  | Cervical cord, temporal cortex           |
|              | 1693 | 59  | F   | 12  | Cervical cord, temporal cortex           |
| sporadic FTD | 1239 | 62  | M   | 5   | Frontal + temporal cortex                |
|              | 1002 | 83  | M   | 8   | Frontal + temporal cortex                |
|              | 213  | 64  | F   | 10  | Frontal + temporal cortex                |
| C9FTD        | 198  | 56  | M   | 12  | Frontal cortex                           |
|              | 470  | 74  | M   | 10  | Frontal cortex                           |
|              | 1335 | 65  | M   | 11  | Frontal cortex                           |
|              | 1233 | 60  | F   | 5   | Frontal cortex                           |
|              | 1077 | 69  | M   | 6   | Frontal cortex                           |
|              | 951  | 68  | F   | 10  | Frontal cortex                           |
| Control      | 196  | 80  | F   | 19  | Cervical cord, frontal + temporal cortex |
|              | 729  | 59  | M   | 12  | Frontal + temporal cortex                |
|              | 90   | 73  | M   | 7   | Frontal + temporal cortex                |
|              | 1094 | 100 | M   | 3   | Cervical cord                            |
|              | 1432 | 83  | F   | 21  | Cervical cord                            |
|              | 57   | 74  | F   | 6   | Frontal cortex                           |

**Supplementary table 3: Post-mortem samples used for qRT-PCR.** All samples were obtained from the University of Michigan Brain Bank or ALS Repository. PMI post-mortem interval, in h

# Supplementary Table 4

|                                               | Fibroblasts                         | iPSCs                                                                       | iPSC + TDP43        | CNS                                             |
|-----------------------------------------------|-------------------------------------|-----------------------------------------------------------------------------|---------------------|-------------------------------------------------|
| <b>Bru-seq (RNA synthesis)</b>                | <u>C9ALS</u><br>inflammation        | <u>C9ALS</u><br>ox/phos                                                     |                     |                                                 |
| <b>Bru-seq + BruChase-seq (RNA stability)</b> | <u>C9ALS</u><br>ribosome<br>ox/phos | <u>C9ALS</u><br>ribosome<br>ox/phos                                         | ribosome<br>ox/phos |                                                 |
| <b>RNA-seq (NeuroLINCS)</b>                   |                                     | <u>C9ALS</u><br>ribosome<br>ox/phos                                         |                     |                                                 |
| <b>qRT-PCR</b>                                | <u>C9ALS</u><br>ribosome<br>ox/phos | <u>C9ALS</u><br>ribosome<br>ox/phos                                         |                     | <u>C9ALS/FTD</u><br>sALS<br>ribosome<br>ox/phos |
| <b>Proteomics</b>                             |                                     | <u>C9ALS, sALS</u><br>ox/phos<br>protein synthesis                          |                     |                                                 |
| <b>Function</b>                               |                                     | <u>C9ALS</u><br>ox/phos (+sALS)<br>protein synthesis<br>protein degradation |                     |                                                 |

**Supplementary table 4: Conserved changes in ribosome and oxidative phosphorylation pathways in ALS patient-derived samples.**

Red text color denotes a reduction, while green color signifies an increase in the indicated pathway. Greyed out color represents a non-significant trend. ox/phos oxidative phosphorylation. CNS central nervous system. RNA-seq data were analyzed from the publicly-available NeuroLINCS resource

# Supplementary Table 5

**Supplementary table 5: Fibroblast aging-related genes displaying concordant changes in RNA stability.** Age-related changes in fibroblast gene expression were detected by RNA-seq (\*, ref. 47). Age-related changes in RNA stability were determined by comparing the stability of each gene, determined by BruChase-seq, in fibroblasts and iPSCs (#, this study). Concordant changes (46/60 mapped genes, 77%) are indicated in yellow

| Aging-related gene* | Gene name                                                          | Fold change* (RNA-seq) | Fold change# (BruChase-seq) |
|---------------------|--------------------------------------------------------------------|------------------------|-----------------------------|
| KHDRBS3             | KH RNA binding domain containing, signal transduction associated 3 | 0.89                   | 0.55                        |
| NETO2               | neuropilin and tolloid like 2                                      | 3.61                   | 2.4                         |
| P2RX5               | purinergic receptor P2X 5                                          | 1.55                   | 4.44                        |
| UCHL1               | ubiquitin C-terminal hydrolase L1                                  | 1.47                   | 2.7                         |
| NES                 | nestin                                                             | 2.33                   | 3.78                        |
| LYN                 | LYN proto-oncogene, Src family tyrosine kinase                     | 2.45                   | 2.54                        |
| CTSH                | cathepsin H                                                        | 1.64                   | 3.92                        |
| SYNGR2              | synaptogyrin 2                                                     | 1.14                   | 2.82                        |
| B4GALNT4            | beta-1,4-N-acetyl-galactosaminyltransferase 4                      | 1.22                   | 4.16                        |
| NEFM                | neurofilament, medium polypeptide                                  | 2.14                   | 5.39                        |
| LRRRC8D             | leucine rich repeat containing 8 family member D                   | 6.59                   | 1.64                        |
| NEFH                | neurofilament heavy polypeptide                                    | 4.51                   | 3.07                        |
| LEPREL1             | Leprecan-Like Protein 1                                            | 1.35                   | 2.77                        |
| SSX2IP              | SSX family member 2 interacting protein                            | 5.03                   | 2.94                        |
| SEZ6L2              | seizure related 6 homolog like 2                                   | 1.58                   | 2.8                         |
| GNAZ                | G protein subunit alpha z                                          | 1.6                    | 3.91                        |
| SLC2A1              | solute carrier family 2 member 1                                   | 3.55                   | 2.69                        |
| LXN                 | latexin                                                            | 1.37                   | 3.56                        |
| DOCK8               | dedicator of cytokinesis 8                                         | 1.09                   | 4.98                        |
| ANO4                | anoctamin 4                                                        | 1.95                   | 3.61                        |
| C1orf226            | chromosome 1 open reading frame 226                                | 4.7                    | 5                           |
| RANBP17             | RAN binding protein 17                                             | 2.38                   | 3.14                        |
| PCDH10              | protocadherin 10                                                   | 3.45                   | 4.4                         |
| LGALS1              | galectin like                                                      | 2.31                   | 2.78                        |
| C3orf70             | chromosome 3 open reading frame 70                                 | 1.75                   | 3.16                        |
| C10orf35            | chromosome 10 open reading frame 35                                | 1.23                   | 4.21                        |
| ATF7IP2             | activating transcription factor 7 interacting protein 2            | 2.18                   | 3.87                        |
| CCDC81              | coiled-coil domain containing 81                                   | 1.12                   | 3.77                        |
| TFAP2A              | transcription factor AP-2 alpha                                    | 3.23                   | 3.69                        |
| PABPC4L             | poly A binding protein cytoplasmic 4 like                          | 1.92                   | 4.03                        |
| TP1P2               | triosephosphate isomerase 1 pseudogene 2                           | 2.35                   | 1.8                         |
| CREB3L1             | cAMP responsive element binding protein 3 like 1                   | 7.72                   | 1.31                        |
| GPR126              | G-Protein Coupled Receptor 126                                     | 1.23                   | 2.97                        |
| SLC16A4             | solute carrier family 16 member 4                                  | 3.7                    | 2.97                        |
| A2M                 | alpha-2-macroglobulin                                              | 1.01                   | 3.61                        |
| SYPL2               | synaptophysin like 2                                               | 3.06                   | 4.11                        |
| LOXL2               | lysyl oxidase like 2                                               | 1.78                   | 2.4                         |
| NTN4                | netrin 4                                                           | 7.09                   | 3.49                        |
| GRIK2               | glutamate ionotropic receptor kainate type subunit 2               | 4.11                   | 2.43                        |
| LAMA3               | laminin subunit alpha 3                                            | 1.87                   | 3.32                        |
| LOC90246            | uncharacterized LOC90246                                           | 11.68                  | 4.16                        |
| RNF207              | ring finger protein 207                                            | 2.95                   | 2.98                        |
| EREG                | epiregulin                                                         | 5.65                   | 4.54                        |
| NPTX1               | neuronal pentraxin 1                                               | 0.4                    | 0.25                        |
| THBS4               | thrombospondin 4                                                   | 0.43                   | 0.12                        |
| VWCE                | von Willebrand factor C and EGF domains                            | 0.68                   | 0.43                        |
| PHEX                | Phosphate regulating endopeptidase homolog, X-linked               | 1.29                   | 0.34                        |
| EYA4                | Eyes absent homolog 4 (Drosophila)                                 | 5.69                   | 0.17                        |
| KIF5C               | Kinesin family member 5C                                           | 0.82                   | 3.3                         |
| CELSR2              | Cadherin, EGF LAG seven-pass G-type receptor 2 (flamingo)          | 0.56                   | 3.63                        |
| FSD1                | Fibronectin type III and SPRY domain containing 1                  | 0.95                   | 3.51                        |
| ETNK2               | Ethanolamine kinase 2                                              | 0.62                   | 2.96                        |
| APBA2               | Amyloid beta (A4) precursor protein-binding, family A, member 2    | 0.88                   | 4.66                        |
| DUSP8               | Dual specificity phosphatase 8                                     | 0.89                   | 4.07                        |
| CORIN               | Corin, serine peptidase                                            | 0.49                   | 3.32                        |
| RGS2                | Regulator of G-protein signaling 2, 24kDa                          | 0.19                   | 3.65                        |
| CXorf57             | Chromosome X open reading frame 57                                 | 1.13                   | 0.45                        |
| GRM1                | Glutamate receptor, metabotropic 1                                 | 18.42                  | 0.34                        |
| MTRNR2L1            | MT-RNR2-like 1                                                     | 1.1                    | 0.2                         |
| ADCY1               | Adenylate cyclase 1 (brain)                                        | 1.65                   | 0.27                        |

# Supplementary Figure 1

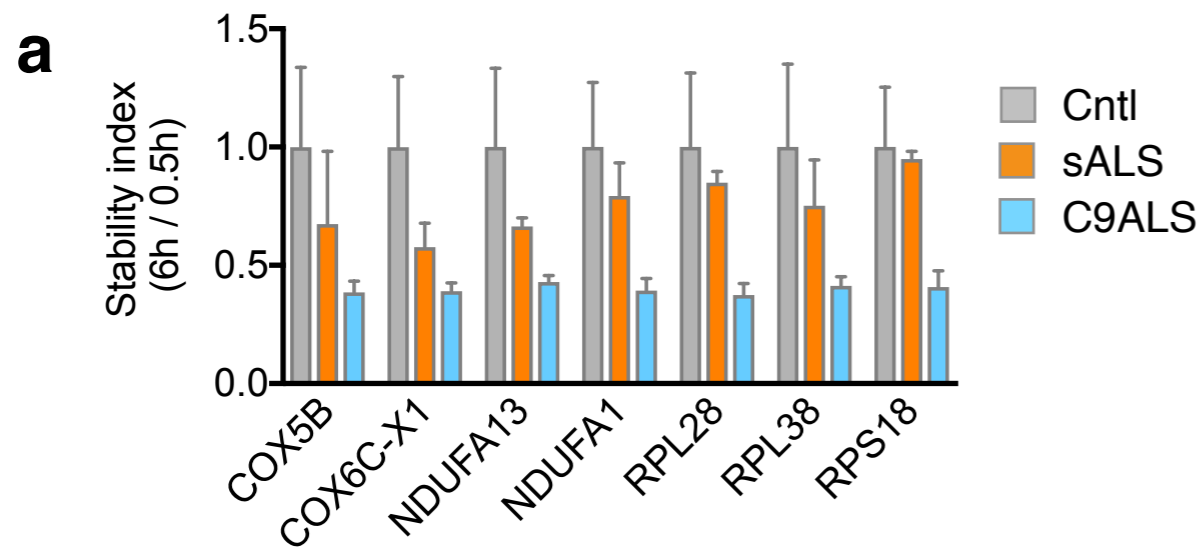

**Supplementary figure 1: Altered RNA stability in ALS fibroblasts.** **a** Validation of RNA destabilization in fibroblasts. Stability index (ratio of transcript abundance at 6 h / 0.5 h) was compared between control (Cntl), sALS and C9ALS fibroblasts (n = 3 lines (Cntl), 2 lines (C9ALS) and 2 lines (sALS), performed in duplicate). Graph shows mean  $\pm$  standard error. **b** 46 transcripts showed consistent increases in stability in C9ALS and sALS fibroblasts, compared to control cells, representing 32% (C9ALS) and 35% (sALS) of stabilized transcripts. **c** 36 transcripts showed consistent reductions in stability in C9ALS and sALS fibroblasts, compared to control cells, representing 19% (C9ALS) and 20% (sALS) of destabilized transcripts

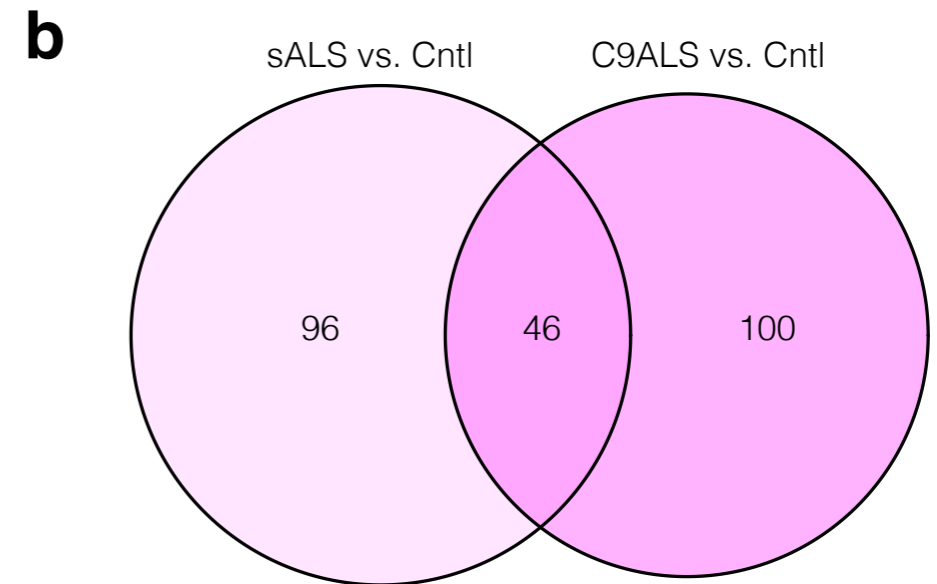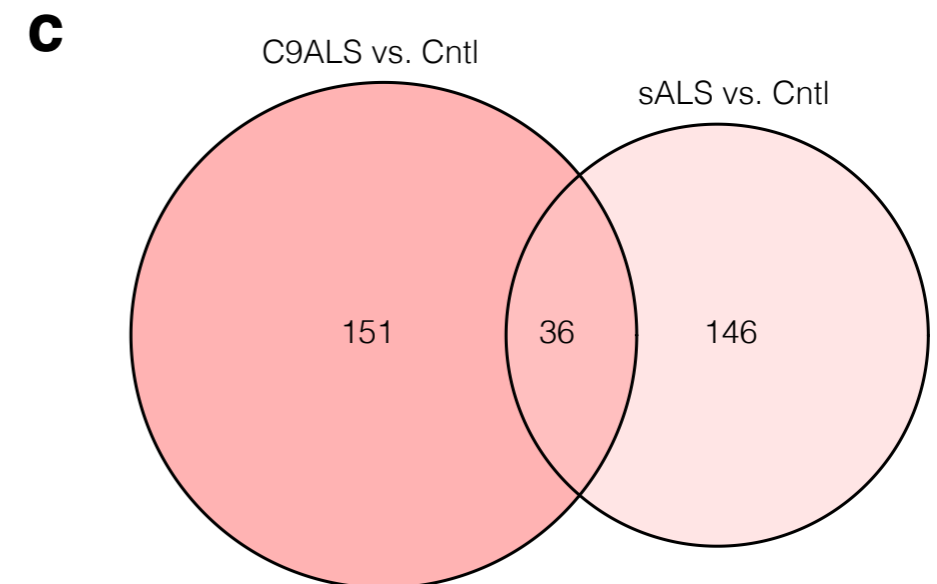

# Supplementary Figure 2

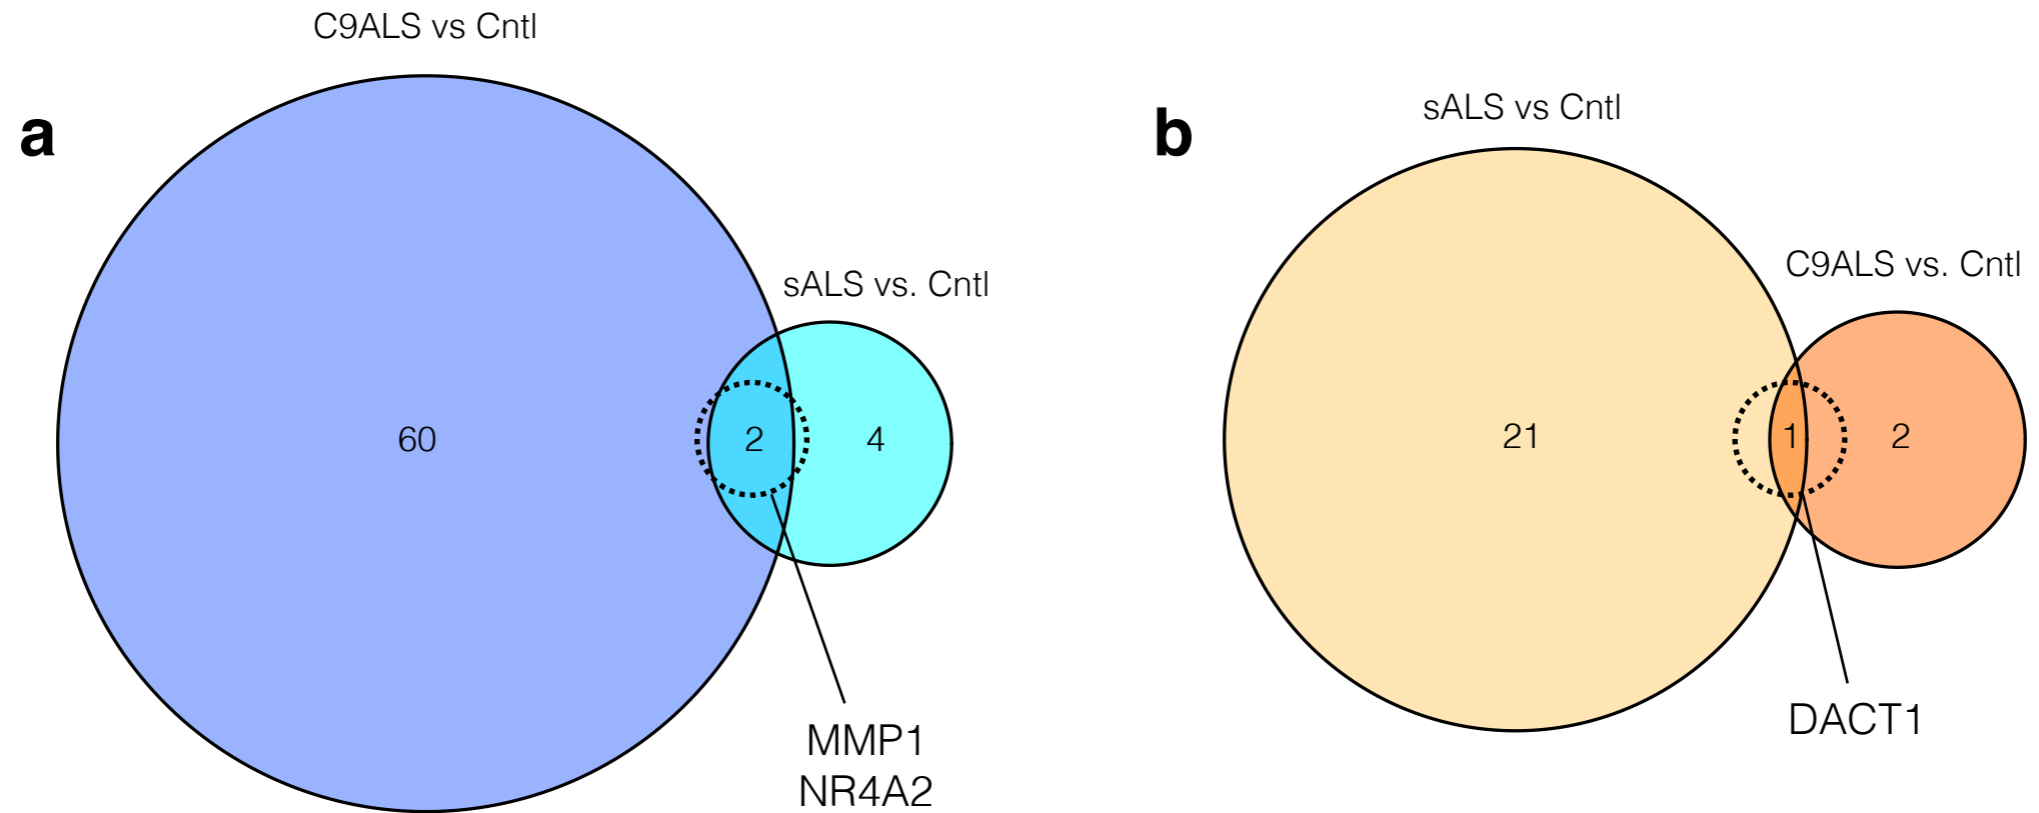

**Supplementary figure 2: Venn diagrams for transcripts displaying altered synthesis in C9ALS and sALS fibroblasts. a** Two transcripts, MMP1 and NR4A2, demonstrated increased synthesis in C9ALS and sALS fibroblasts, compared to control (Cntl) cells. **b** Only DACT1 displayed reduced synthesis in C9ALS and sALS fibroblasts, compared to control cells

# Supplementary Figure 3

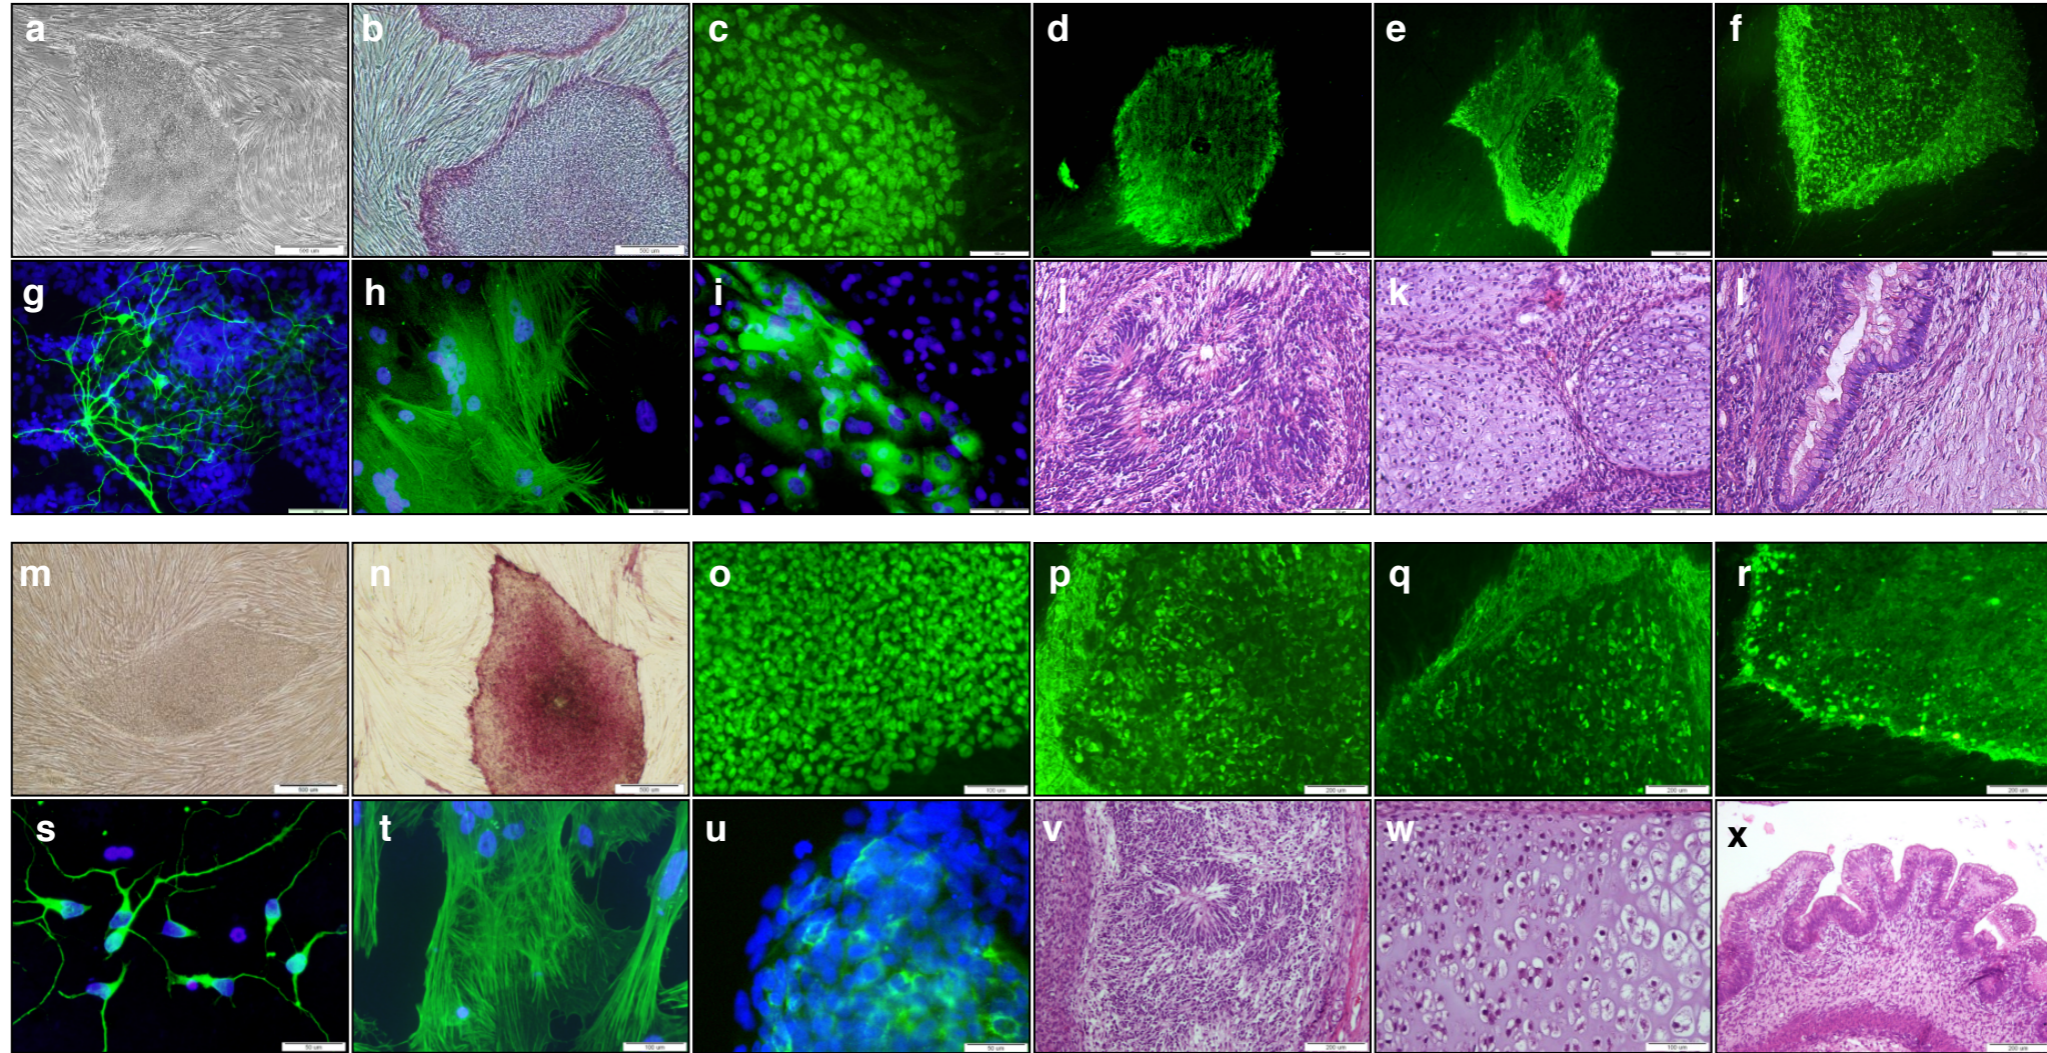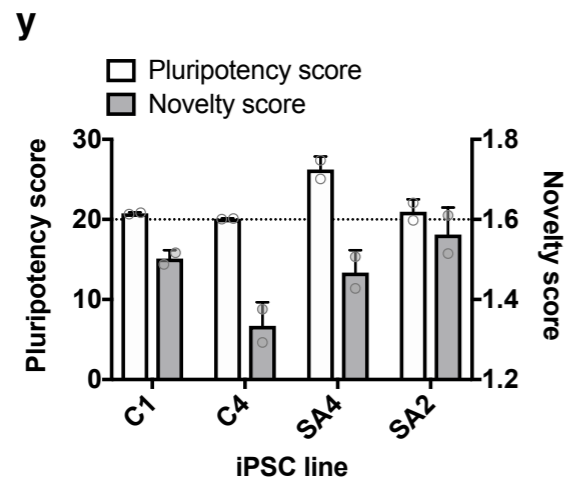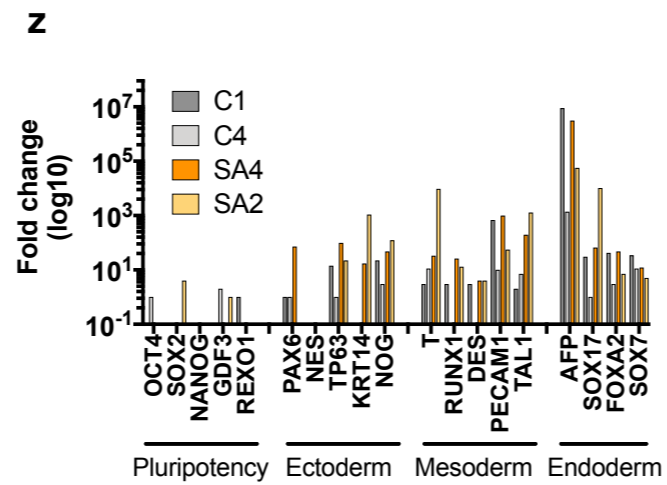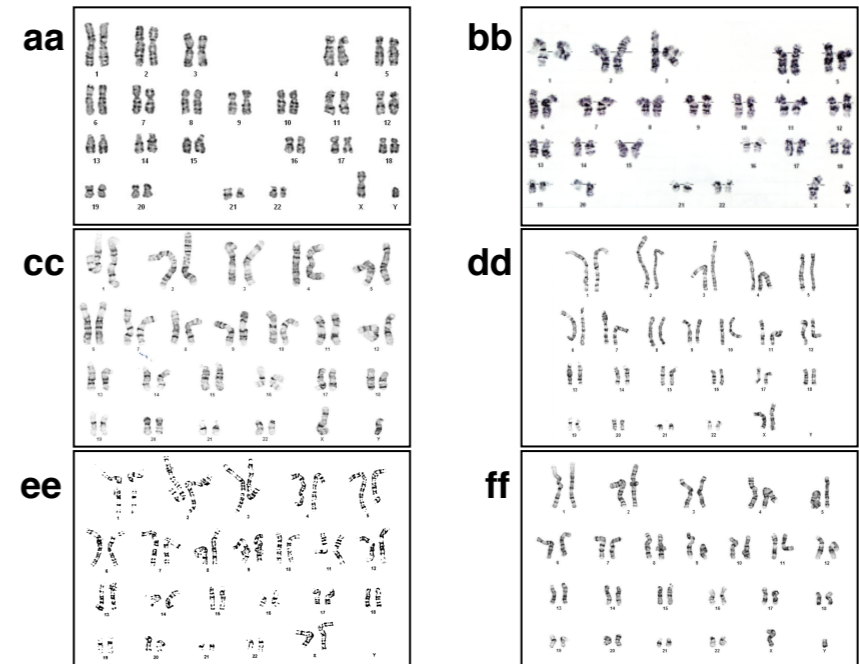

**Supplementary figure 3: iPSC characterization.** C9A4 (**a-l**) and C9A2 (**m-x**) formed colonies with typical stem cell morphology when cultured on a feeder layer (**a, m**; phase contrast images). Undifferentiated iPS colonies expressed alkaline phosphatase (**b, n**) and Oct-4 (**c, o**). iPS colonies also expressed pluripotent markers Tra-1-60 (**d, p**), Tra-1-81 (**e, q**) and SSEA-4 (**f, r**). Embryoid bodies (EBs) formed from these lines harbored cells expressing neuronal  $\beta$ -tubulin III (**g, s**; ectoderm), muscle actin (**h, t**; mesoderm) and  $\alpha$ -fetoprotein (**i, u**; endoderm). Undifferentiated cells were inoculated subcutaneously into NOD SCID mice and teratoma developed. Hematoxylin-eosin stained histological sections of teratoma demonstrated neural rosettes (**j, v**; ectoderm), cartilage/bone (**k, w**; mesoderm) and columnar glandular epithelium (**l, x**; endoderm). Scale bars: 500  $\mu$ m for a, b, m, n; 200  $\mu$ m for d, p, e, q, f, r, j, v, l, x; 100  $\mu$ m for c, o, h, t, k, w; and 50 $\mu$ m for g, s, i, u. **y** Results of the PluriTest<sup>5</sup> in the indicated cell lines, performed in duplicate; Pluripotency scores > 20 and novelty scores < 1.6 indicate less than 10% differentiation. Plot shows mean mean  $\pm$  standard error. **z** iPSCs were differentiated into EBs, and fold change in gene expression in EBs vs. undifferentiated iPSCs monitored by qRT-PCR. Elevated expression (>2 fold or higher) was noted for genes indicative of all 3 germ layers. Karyotypes were normal for all lines, including C9A4 (**aa**), C9A2 (**bb**), C1 (**cc**), C4 (**dd**), SA4 (**ee**) and SA2 (**ff**)



# Supplementary Figure 4

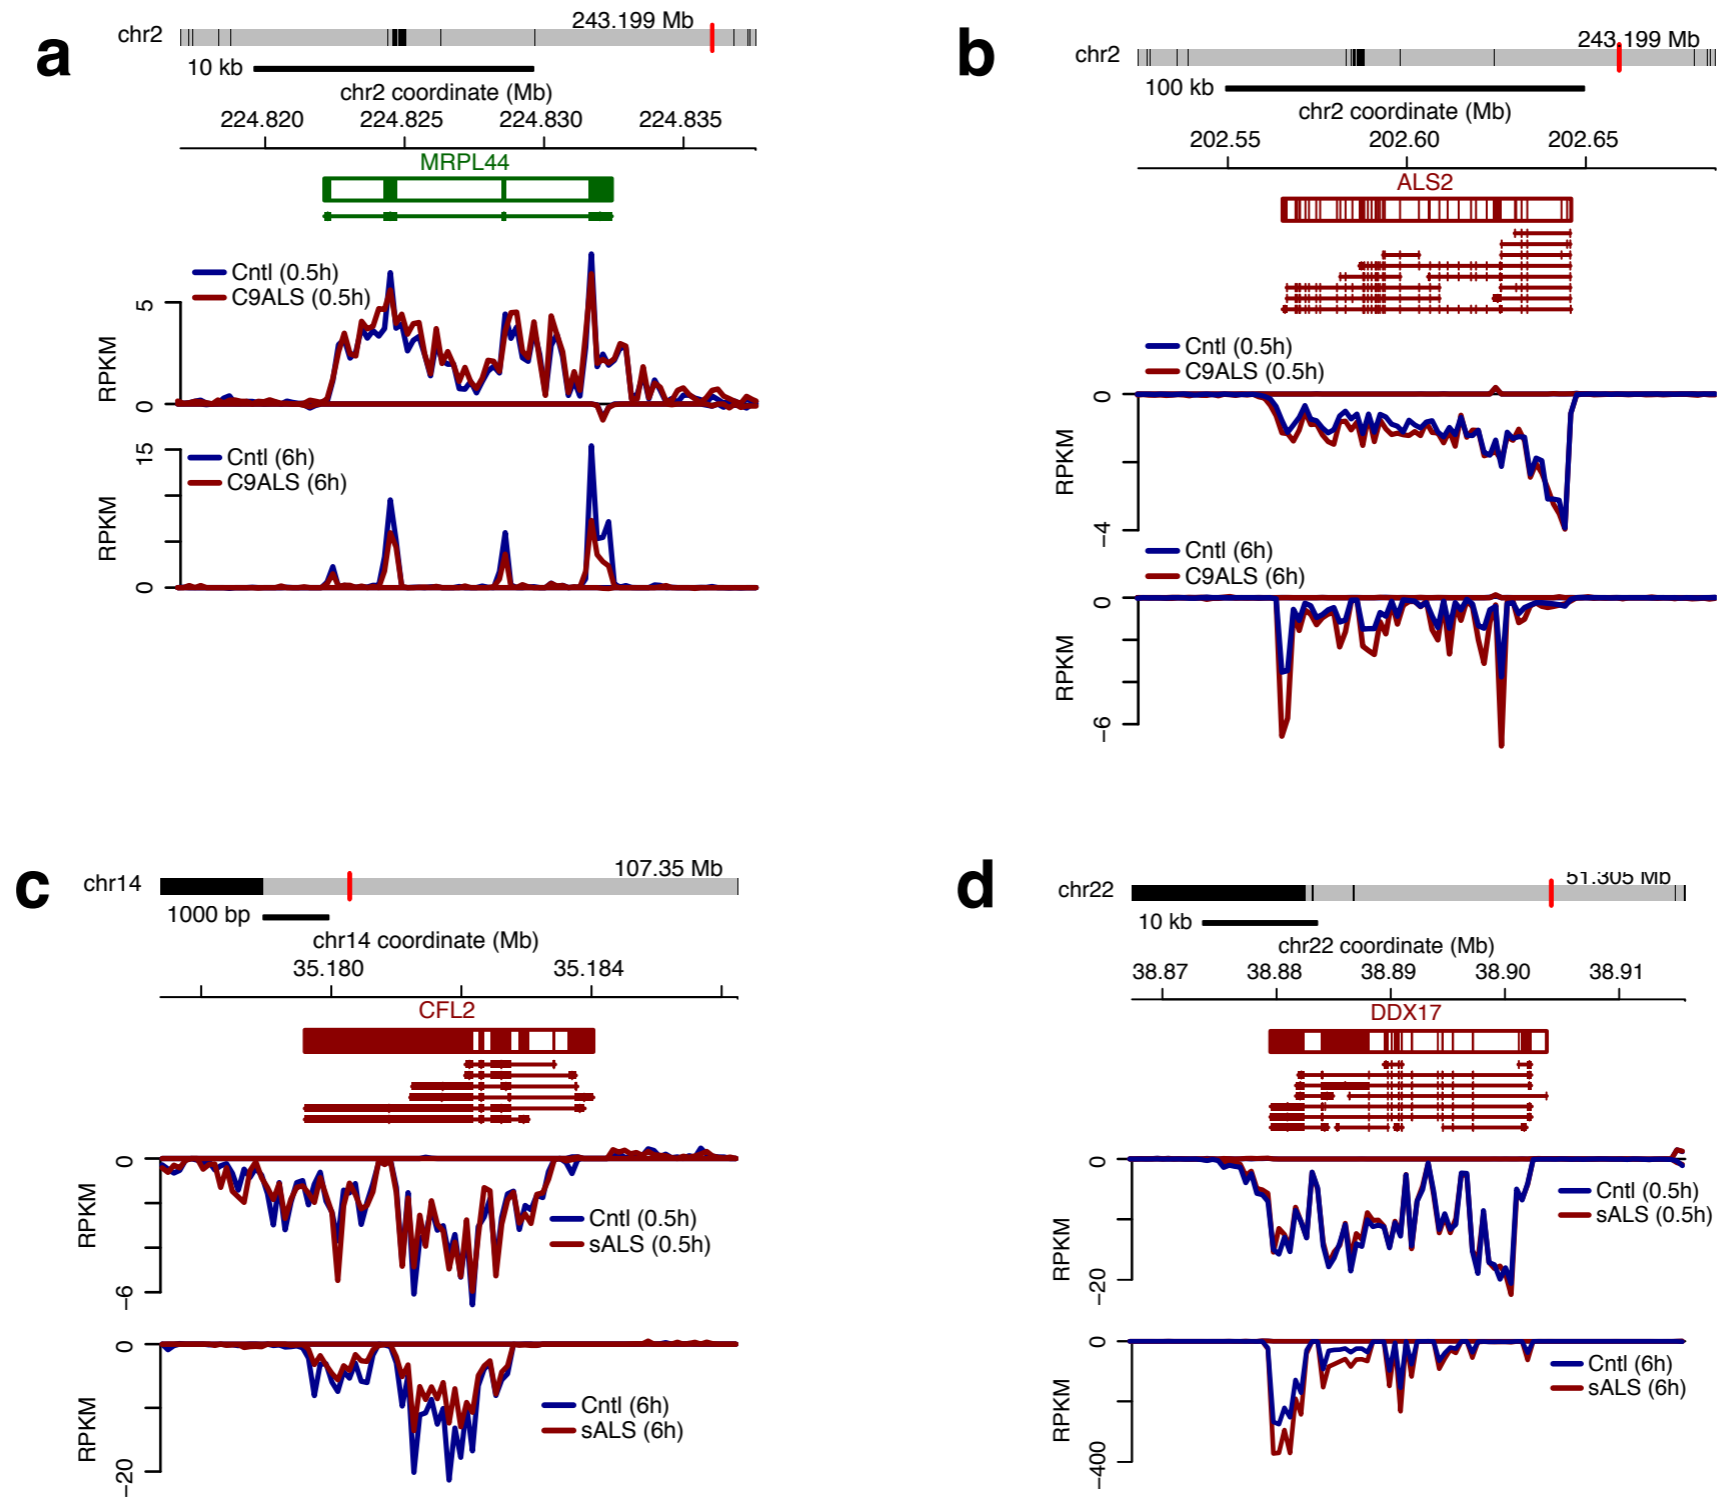

**Supplementary figure 4: BruChase-seq in ALS patient-derived iPSCs.** Example traces of RNA transcripts showing (a) destabilization or (b) stabilization in C9ALS iPSCs. Representative examples of RNA transcripts showing (c) destabilization or (d) stabilization in C9ALS iPSCs

# Supplementary Figure 5

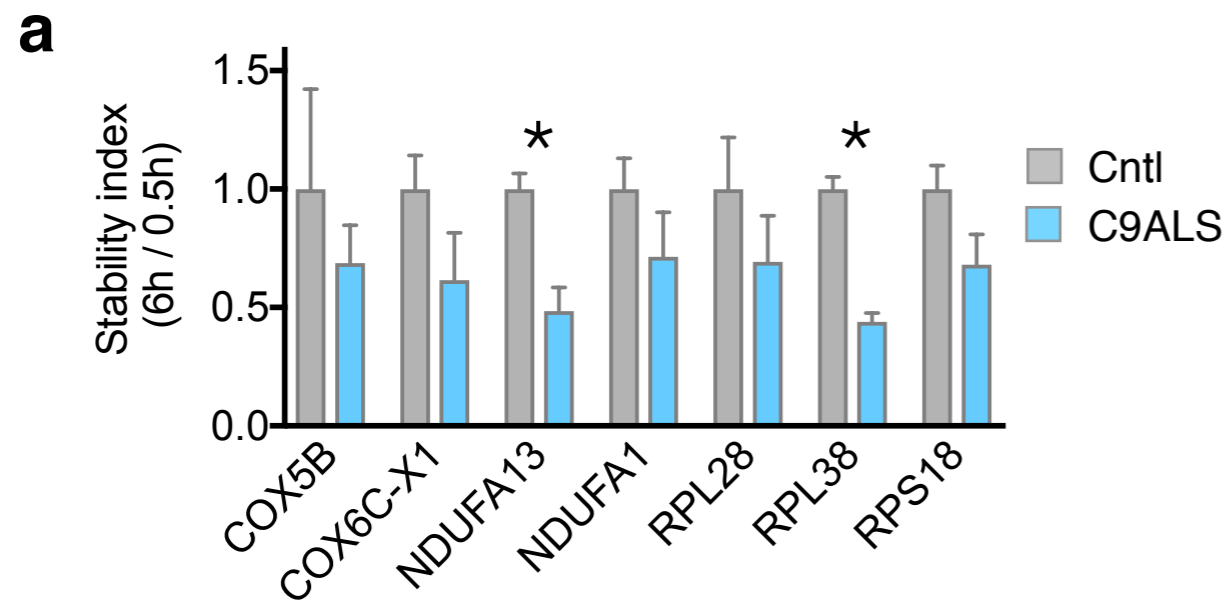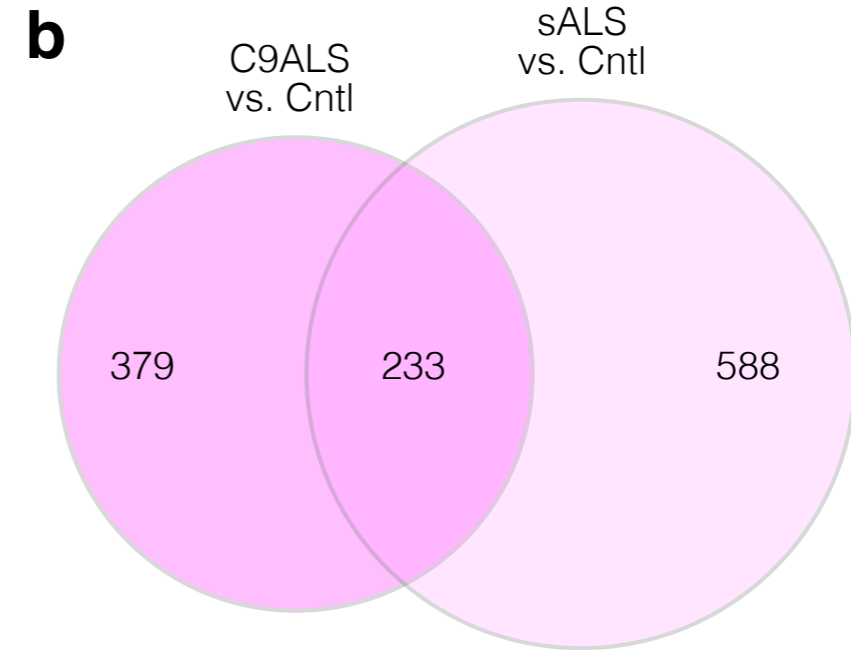

**Supplementary Figure 5: Overlap of RNA stability changes in ALS iPSCs.** **a** Validation of RNA stability changes by qRT-PCR. The stability index for each transcript, calculated as the ratio of abundance at 6 h / 0.5 h, highlighted destabilization of select RNAs involved in oxidative phosphorylation and ribosome assembly (n = 2 lines per group, performed in duplicate). \*, p < 0.0001 by two-tailed t-test. Graph shows mean ± standard error. **b** Venn diagram indicating the 233 transcripts stabilized in both C9ALS and sALS iPSCs, compared to control (Cntl) cells, representing 38% (C9ALS) and 28% (sALS) of stabilized transcripts. **c** 17 transcripts were commonly destabilized in C9ALS and sALS iPSCs, in comparison to control iPSCs, representing 5% (C9ALS) and 39% (sALS) of destabilized transcripts

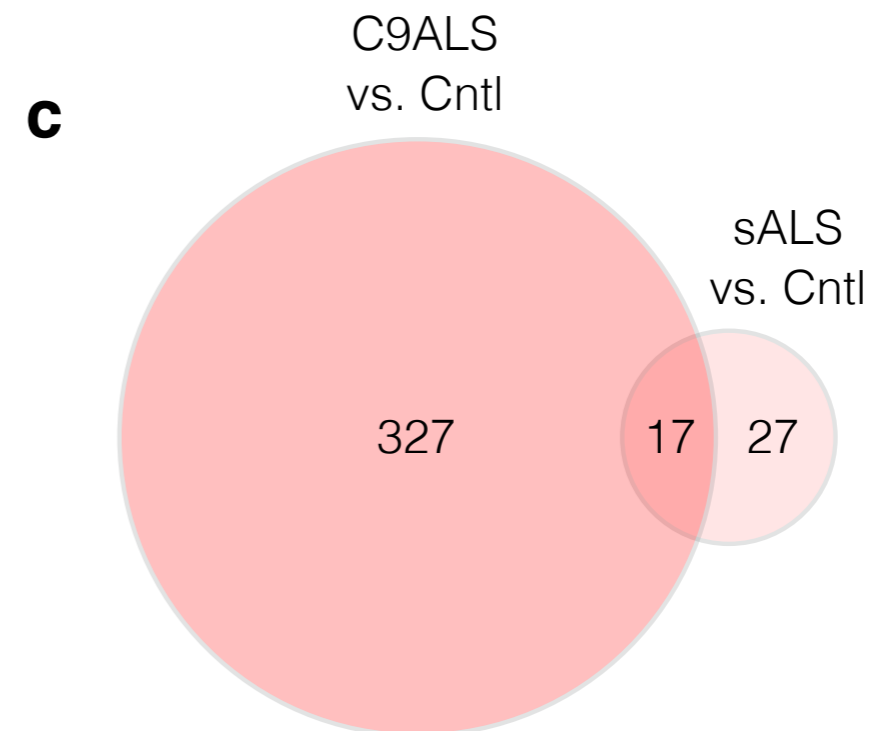

# Supplementary Figure 6

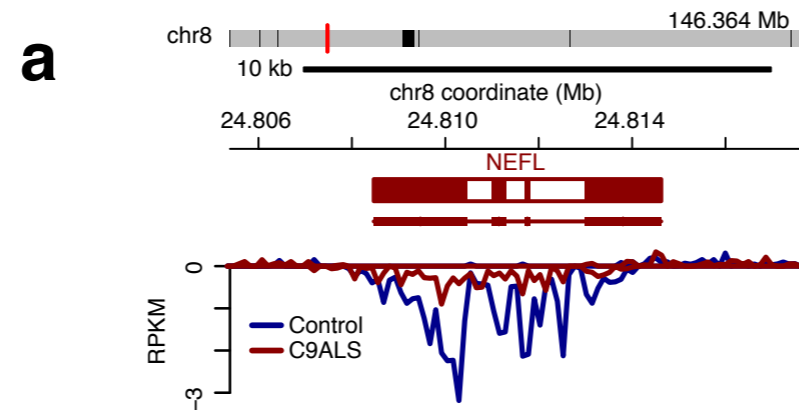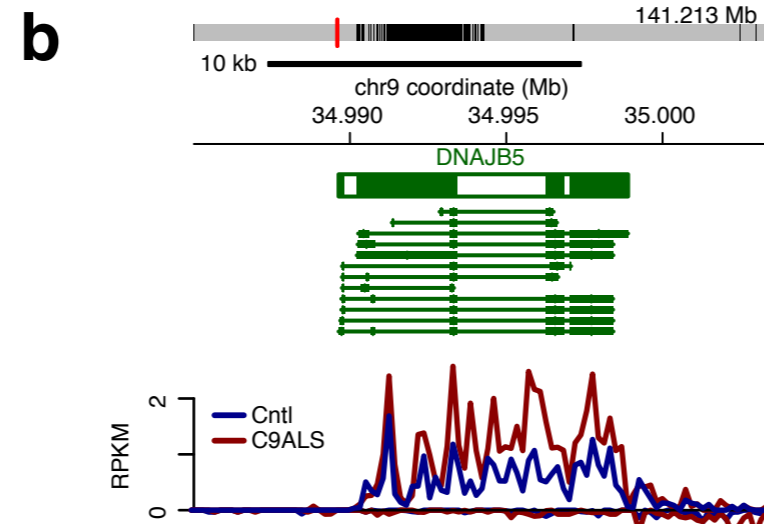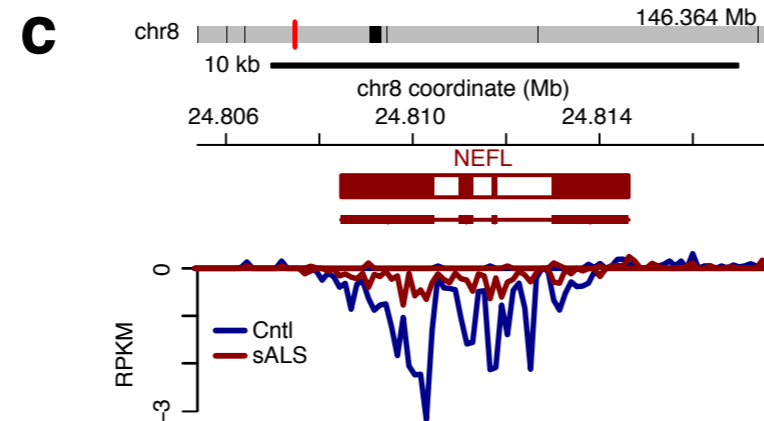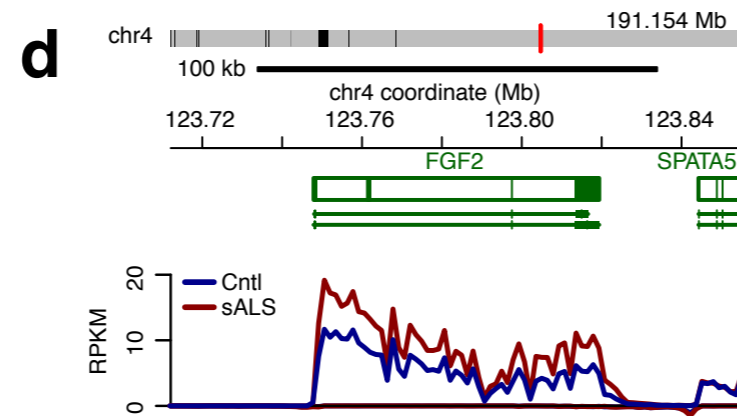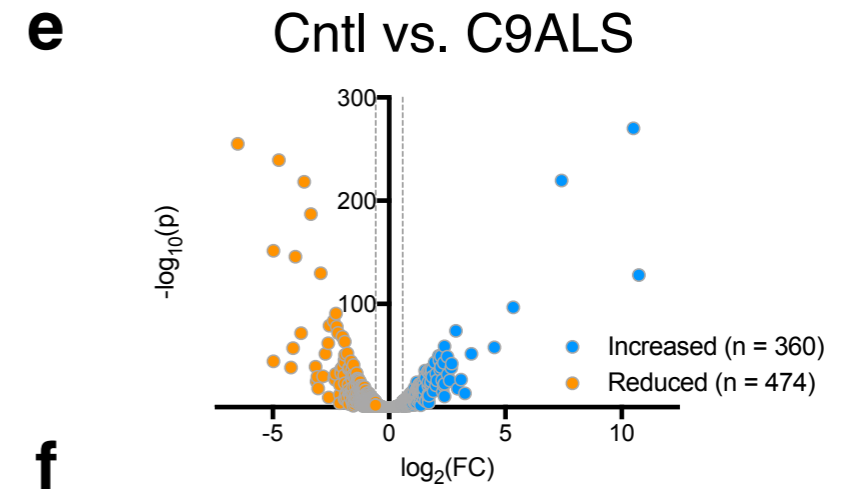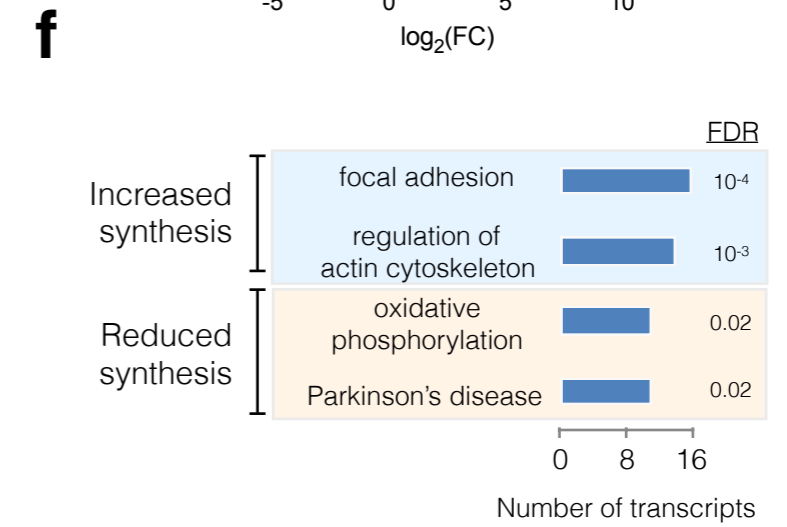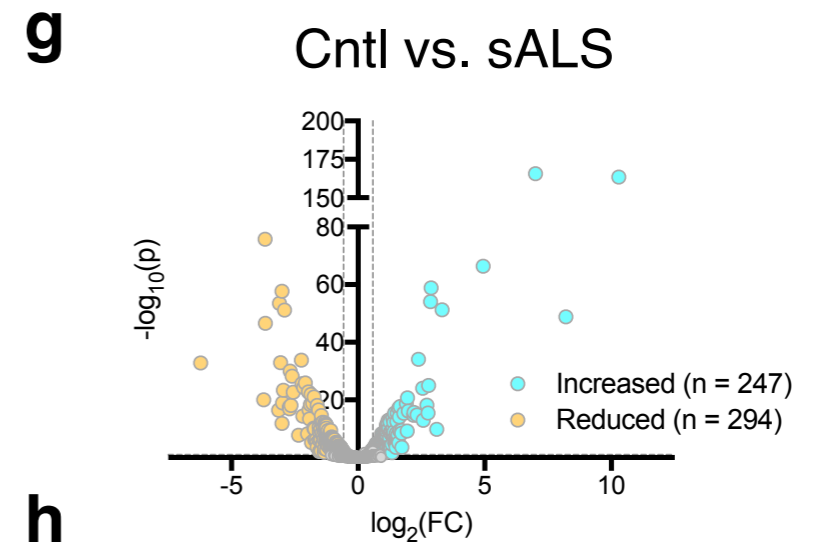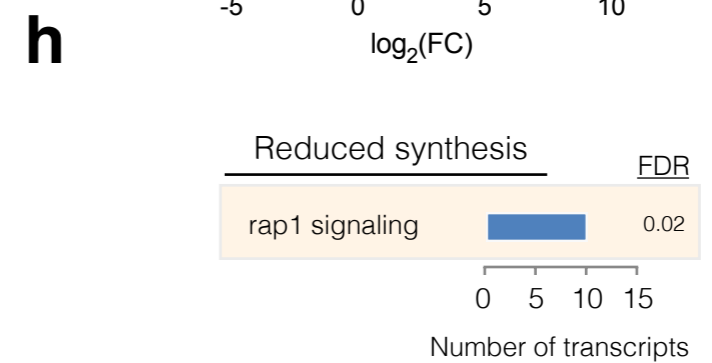

**Supplementary figure 6: RNA synthesis in ALS iPSCs.** Representative traces of RNA transcripts showing (a) reduced or (b) increased synthesis in C9ALS iPSCs. Examples of RNA transcripts showing (c) reduced or (d) increased synthesis in sALS iPSCs. e Volcano plot for 834 transcripts showing significant changes in synthesis in C9ALS iPSCs, in comparison to control (Cntl) cells. (f) Gene ontology for transcripts displaying altered synthesis in C9ALS iPSCs. FDR, false discovery rate. g Volcano plot for 541 transcripts exhibiting significant changes in synthesis in sALS iPSCs, compared to control cells. h Gene ontology for transcripts displaying reduced synthesis in sALS iPSCs. FC fold change. Adjusted p value calculated by DESeq2. Dotted lines in (e) and (g) depict an adjusted p value of 1 and fold change of 1.5

# Supplementary Figure 7

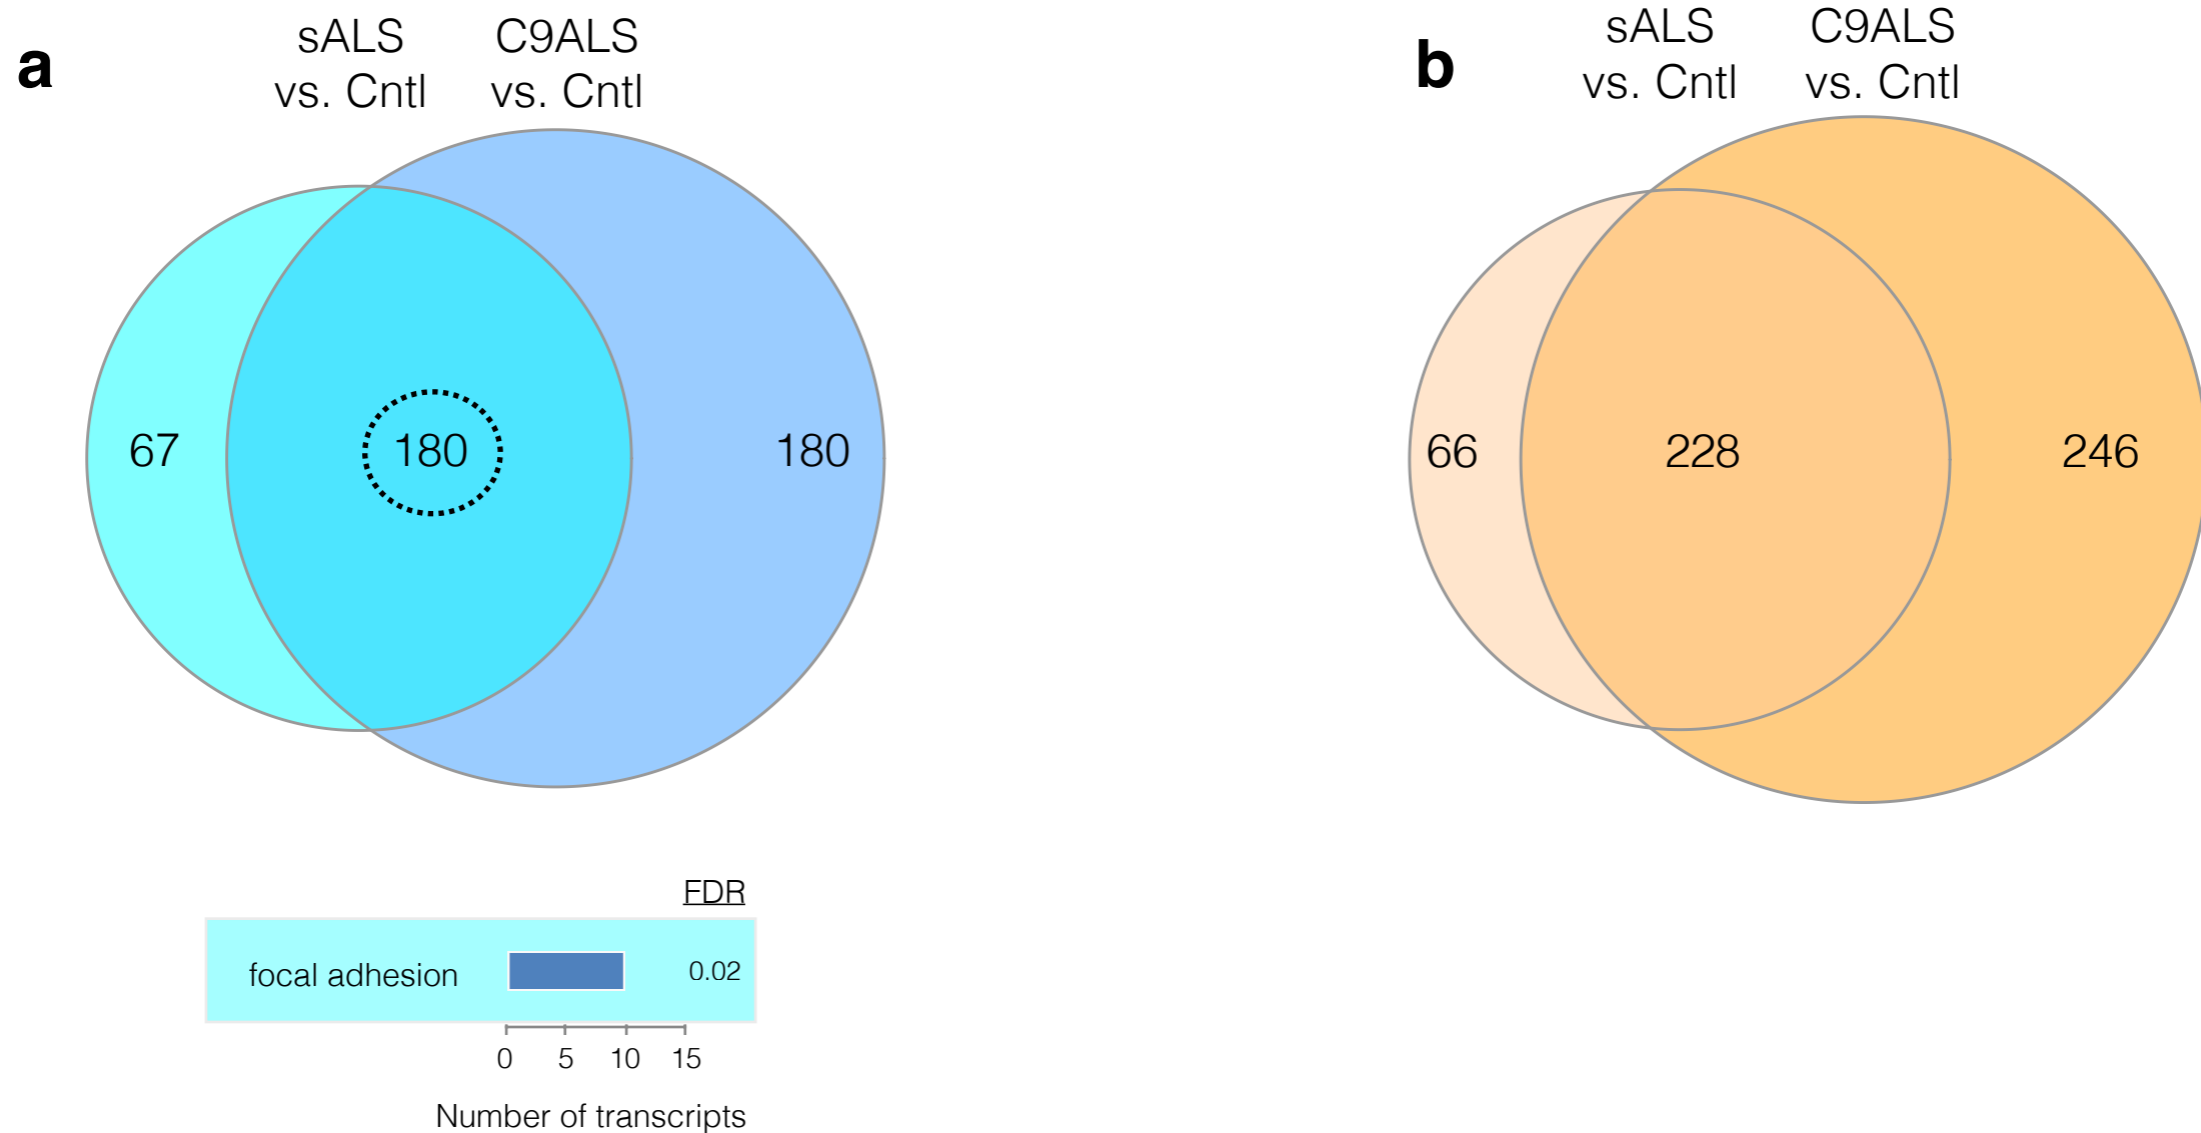

**Supplementary figure 7: Pathway analysis of transcripts displaying altered synthesis in ALS iPSCs. a** 180 transcripts, enriched in focal adhesion determinants, demonstrated increased synthesis in C9ALS and sALS iPSCs, compared to control (Cntl) cells, representing 50% (C9ALS) and 73% (sALS) of transcripts. **b** 228 transcripts displayed reduced synthesis in C9ALS and sALS iPSCs, compared to control cells, representing 40% (C9ALS) and 80% (sALS) of transcripts, respectively. FDR false discovery rate

# Supplementary Figure 8

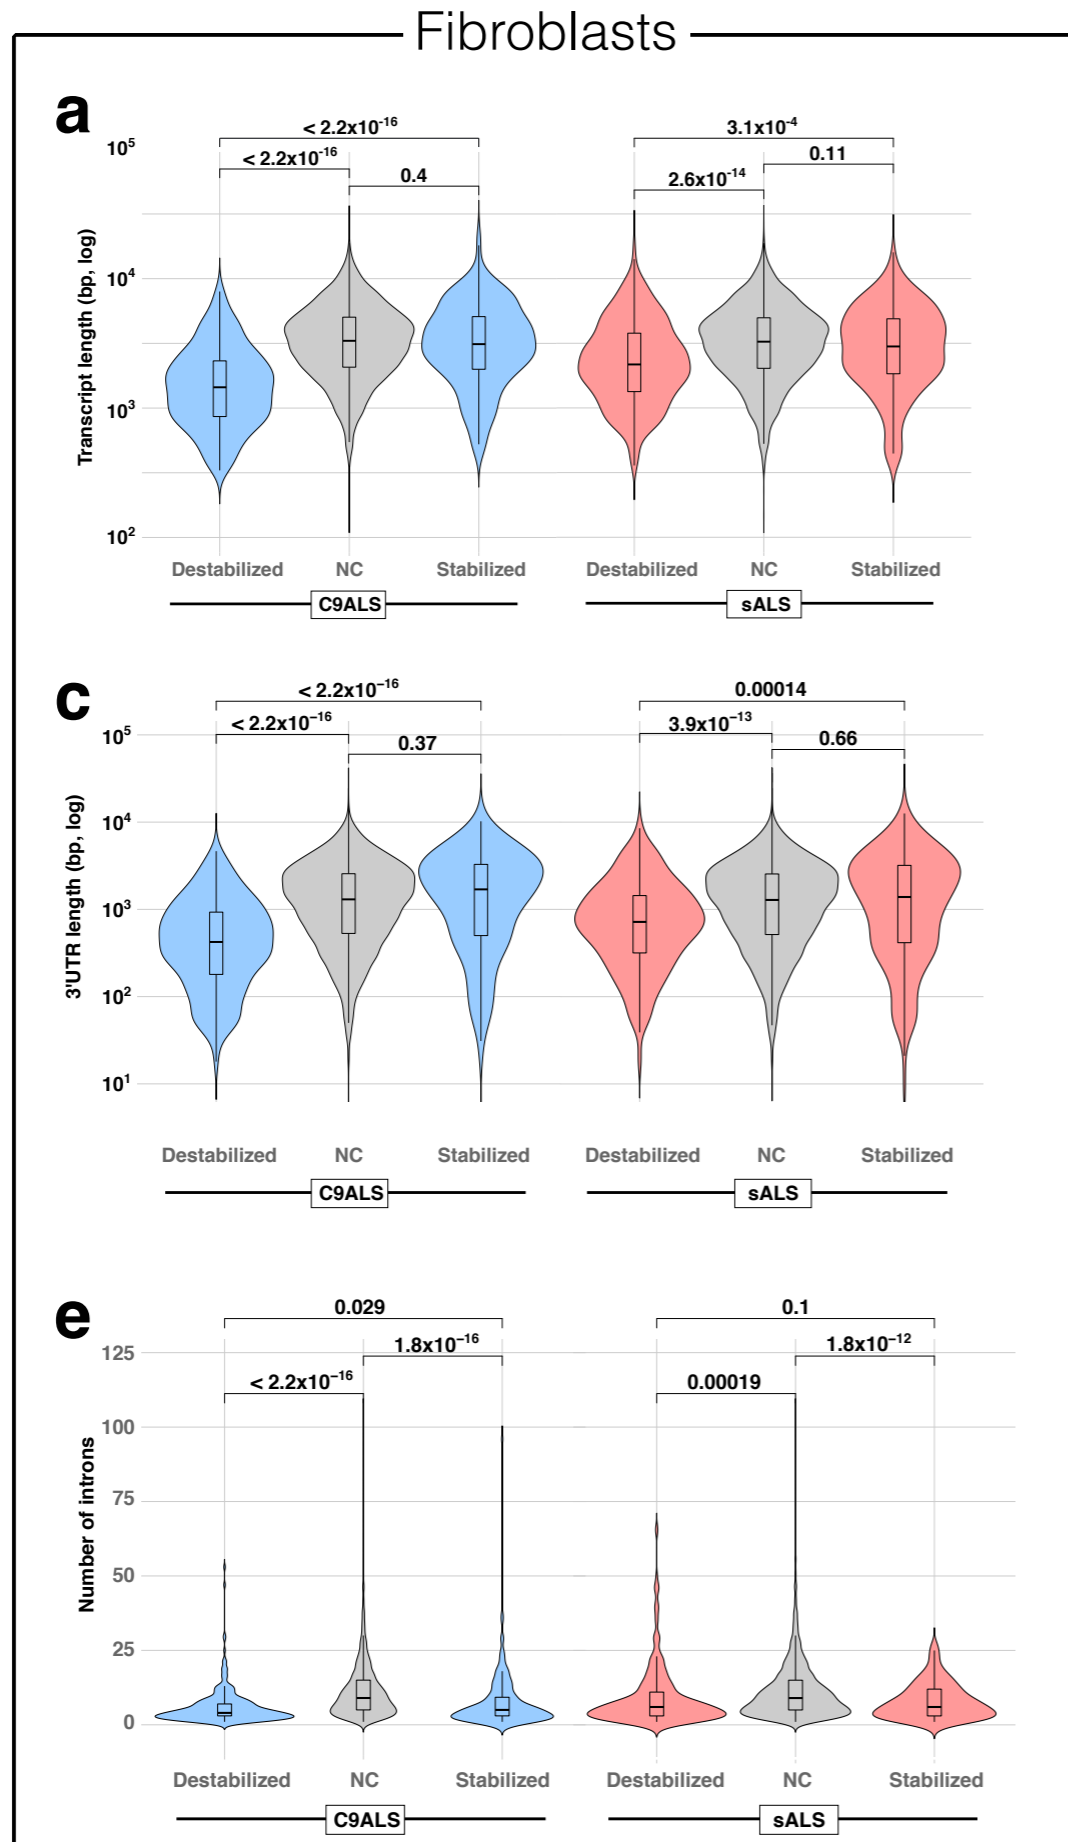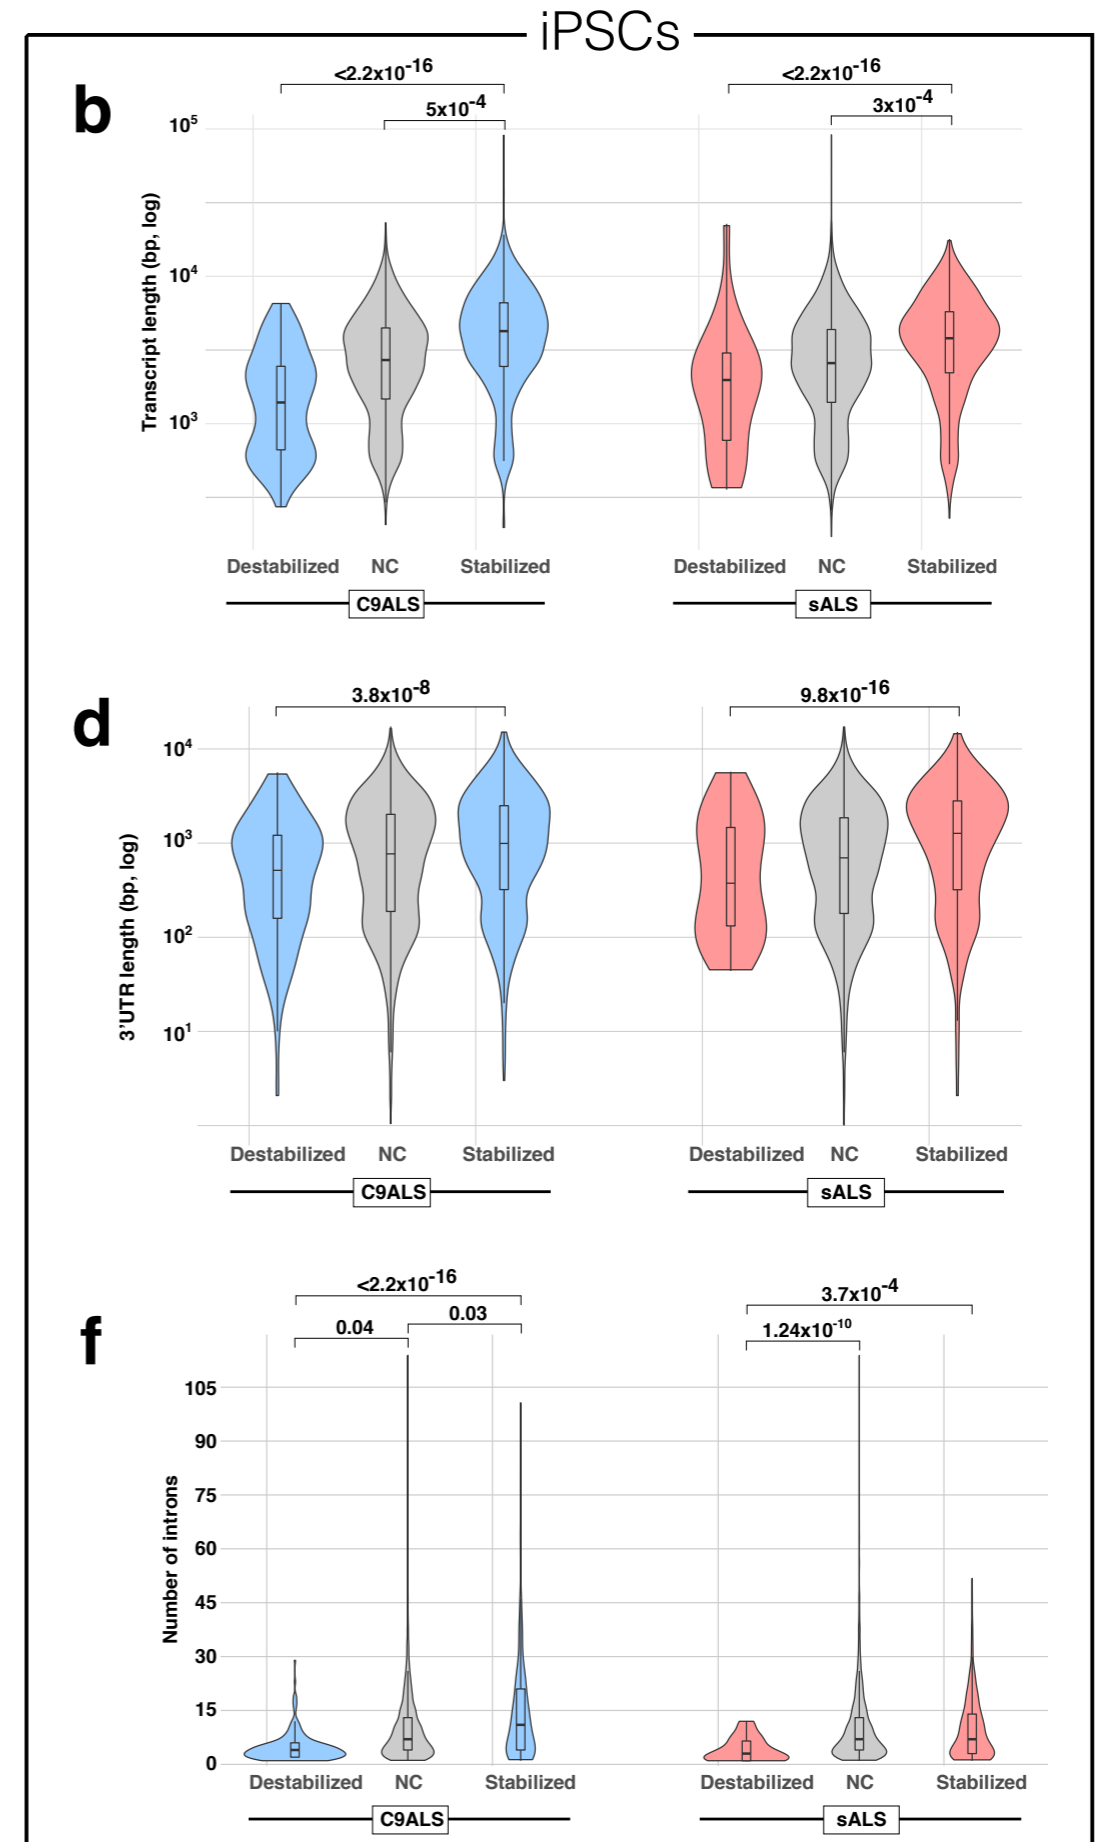

**Supplementary figure 8: Features associated with transcript stability.** Transcript length is proportional to RNA stability in (a) fibroblasts and (b) iPSCs from C9ALS and sALS patients, compared to controls. 3'UTR length is also predictive of RNA stability in (c) fibroblasts and (d) iPSCs from ALS patients. The number of introns per transcript was lower in RNAs that were stabilized and destabilized in ALS (e) fibroblasts and (f) iPSCs. p values for each comparison determined by Student's t-test for normally distributed data (a, c, e) or the Kruskal-Wallis rank-sum test for non-normally distributed data (b, d, f). Violin plots show median (horizontal line), interquartile range (box), 95% confidence intervals (vertical lines), and number of observations (width)

# Supplementary Figure 9

| a<br>Fibroblasts |              |          | adjusted p-values |                 |                   |                 | -Log10(adjusted p-values) |               |                   |                 | Reference                                             |
|------------------|--------------|----------|-------------------|-----------------|-------------------|-----------------|---------------------------|---------------|-------------------|-----------------|-------------------------------------------------------|
|                  |              |          | fibro_C9_destab   | fibro_C9_stab   | fibro_sALS_destab | fibro_sALS_stab | fibro_C9_destab           | fibro_C9_stab | fibro_sALS_destab | fibro_sALS_stab |                                                       |
| RBP              | Motif        | Count    |                   |                 |                   |                 |                           |               |                   |                 |                                                       |
| PCBP2            | YYYYHCH      | 4        | 7.88E-117         | 1.61E-77        | 1.82E-138         | 9.82E-83        | 116.1                     | 76.8          | 137.7             | 82.0            | Ray D et al. Nature. 2013 Jul 11;499(7457):172        |
| PABPC4           | VVAAADV      | 4        | 5.05E-36          | 7.47E-52        | 1.88E-25          | 3.98E-69        | 35.3                      | 51.1          | 24.7              | 68.4            | Ray D et al. Nature. 2013 Jul 11;499(7457):172        |
| huR              | UUUDUUU      | 4        | 5.57E-33          | 2.83E-46        | 7.58E-28          | 5.69E-56        | 32.3                      | 45.5          | 27.1              | 55.2            | Ray D et al. Nature. 2013 Jul 11;499(7457):172        |
| PABPC1           | AAAAA        | 4        | 2.21E-17          | 1.44E-35        | 9.40E-13          | 1.88E-54        | 16.7                      | 34.8          | 12.0              | 53.7            | Görlach M et al. Exp Cell Res. 1994; 211; (2) 400     |
| TIA1             | UUUUU        | 4        | 2.21E-17          | 1.44E-35        | 9.40E-13          | 1.88E-54        | 16.7                      | 34.8          | 12.0              | 53.7            | Ray D et al. Nature. 2013 Jul 11;499(7457):172        |
| ELAVL1           | UUUGUUU      | 4        | 9.34E-13          | 6.53E-35        | 2.41E-11          | 3.68E-42        | 12.0                      | 34.2          | 10.6              | 41.4            | Ray D et al. Nature. 2013 Jul 11;499(7457):172        |
| Syncrip          | MAAAWW       | 4        | 6.40E-08          | 9.81E-22        | 1.94E-04          | 6.42E-40        | 7.2                       | 21.0          | 3.7               | 39.2            | Ray D et al. Nature. 2013 Jul 11;499(7457):172        |
| <b>TDP43</b>     | <b>UGUGU</b> | <b>4</b> | <b>1.91E-06</b>   | <b>2.64E-22</b> | <b>6.51E-22</b>   | <b>2.38E-30</b> | <b>5.7</b>                | <b>21.6</b>   | <b>21.2</b>       | <b>29.6</b>     | Polymenidou M et al. (2011) Nat Neurosci, 14, 459     |
| ZNF638           | KUKSKD       | 4        | 2.43E-14          | 2.61E-28        | 1.48E-26          | 1.25E-28        | 13.6                      | 27.6          | 25.8              | 27.9            | Ray D et al. Nature. 2013 Jul 11;499(7457):172        |
| SRSF1            | RGAAGRRY     | 4        | 8.59E-27          | 1.36E-20        | 6.44E-37          | 4.33E-16        | 26.1                      | 19.9          | 36.2              | 15.4            | Tacke R, Manley JL. EMBO J. 1995; 14; (14) 3540       |
| hnRNPH2          | GGGAGGG      | 4        | 4.10E-29          | 9.32E-21        | 8.60E-60          | 6.79E-11        | 28.4                      | 20.0          | 59.1              | 10.2            | Ray D et al. Nature. 2013 Jul 11;499(7457):172        |
| FMR1             | DWGG         | 4        | 7.25E-37          | 9.00E-15        | 7.25E-66          | 8.04E-08        | 36.1                      | 14.0          | 65.1              | 7.1             | Chen L et al. Neurosci. 2003; 120; (4) 1005           |
| hnRNPK           | CCAWMCC      | 3        | 5.56E-10          | 7.09E-07        | 2.35E-30          |                 | 9.3                       | 6.1           | 29.6              | 0.0             | Ray D et al. Nature. 2013 Jul 11;499(7457):172        |
| MBNL1            | YGCY         | 2        | 6.96E-03          |                 | 4.36E-15          |                 | 2.2                       | 0.0           | 14.4              | 0.0             | Goers ES et al. Nucleic Acids Res. 2010; 38; (7) 2467 |
| FUS              | GUGGU        | 2        |                   | 2.09E-02        | 4.89E-11          |                 | 0.0                       | 1.7           | 10.3              | 0.0             | Lagier-Tourenne C et al. Nat Neurosci. 2012 15, 1488  |
| EIF2a            | GCAUG        | 3        | 2.02E-04          | 2.19E-02        | 2.63E-10          |                 | 3.7                       | 1.7           | 9.6               | 0.0             | Ray D et al. Nature. 2013 Jul 11;499(7457):172        |
| FXR2             | GACRRR       | 1        |                   |                 | 4.40E-03          |                 | 0.0                       | 0.0           | 2.4               | 0.0             | Ray D et al. Nature. 2013 Jul 11;499(7457):172        |

International Union of Pure and Applied Chemistry (IUPAC) ambiguity code

| Code | Represents          | Complement |
|------|---------------------|------------|
| A    | Adenine             | U          |
| G    | Guanine             | C          |
| C    | Cytosine            | G          |
| U    | Uracil              | A          |
| Y    | Pyrimidine (C or U) | R          |
| R    | Purine (A or G)     | Y          |
| W    | weak (A or U)       | W          |
| S    | strong (G or C)     | S          |
| K    | keto (U or G)       | M          |
| M    | amino (C or A)      | K          |
| D    | A, G, U (not C)     | H          |
| V    | A, C, G (not U)     | B          |
| H    | A, C, U (not G)     | D          |
| B    | C, G, U (not A)     | V          |
| X/N  | any base            | X/N        |

| b<br>iPSCs   |              |          | adjusted p-values |                 |                  |                 | -Log10(adjusted p-values) |              |                  |                | Reference                                         |
|--------------|--------------|----------|-------------------|-----------------|------------------|-----------------|---------------------------|--------------|------------------|----------------|---------------------------------------------------|
|              |              |          | iPSC_C9_destab    | iPSC_C9_stab    | iPSC_sALS_destab | iPSC_sALS_stab  | iPSC_C9_destab            | iPSC_C9_stab | iPSC_sALS_destab | iPSC_sALS_stab |                                                   |
| RBP          | Motif        | Count    |                   |                 |                  |                 |                           |              |                  |                |                                                   |
| huR          | UUUDUUU      | 3        | 3.64E-10          | 2.92E-31        |                  | 1.94E-38        | 9.4                       | 30.5         | 0.0              | 37.7           | Ray D et al. Nature. 2013 Jul 11;499(7457):172    |
| PCBP2        | YYYYHCH      | 3        | 1.01E-04          | 7.18E-15        |                  | 2.09E-22        | 4.0                       | 14.1         | 0.0              | 21.7           | Ray D et al. Nature. 2013 Jul 11;499(7457):172    |
| PABPC4       | VVAAADV      | 3        | 2.01E-02          | 4.12E-11        |                  | 1.46E-21        | 1.7                       | 10.4         | 0.0              | 20.8           | Ray D et al. Nature. 2013 Jul 11;499(7457):172    |
| TIA1         | UUUUU        | 3        | 2.78E-04          | 6.91E-13        |                  | 3.80E-18        | 3.6                       | 12.2         | 0.0              | 17.4           | Ray D et al. Nature. 2013 Jul 11;499(7457):172    |
| PABPC1       | AAAAA        | 3        | 2.78E-04          | 6.91E-13        |                  | 3.80E-18        | 3.6                       | 12.2         | 0.0              | 17.4           | Görlach M et al. Exp Cell Res. 1994; 211; (2) 400 |
| ELAVL1       | UUUGUUU      | 3        | 1.08E-02          | 2.01E-12        |                  | 1.18E-15        | 2.0                       | 11.7         | 0.0              | 14.9           | Ray D et al. Nature. 2013 Jul 11;499(7457):172    |
| <b>TDP43</b> | <b>UGUGU</b> | <b>3</b> | <b>2.00E-02</b>   | <b>1.65E-12</b> |                  | <b>3.63E-13</b> | <b>1.7</b>                | <b>11.8</b>  | <b>0.0</b>       | <b>12.4</b>    | Polymenidou M et al. (2011) Nat Neurosci, 14, 459 |
| Syncrip      | MAAAWW       | 2        |                   | 7.88E-08        |                  | 7.54E-10        | 0.0                       | 7.1          | 0.0              | 9.1            | Ray D et al. Nature. 2013 Jul 11;499(7457):172    |
| hnRNPH2      | GGGAGGG      | 2        |                   | 3.33E-06        |                  | 2.86E-07        | 0.0                       | 5.5          | 0.0              | 6.5            | Ray D et al. Nature. 2013 Jul 11;499(7457):172    |
| FXR1         | AYGRMR       | 2        |                   | 1.89E-04        |                  | 4.55E-05        | 0.0                       | 3.7          | 0.0              | 4.3            | Ray D et al. Nature. 2013 Jul 11;499(7457):172    |
| SRSF1        | RGAAGRRY     | 1        |                   |                 |                  | 2.09E-04        | 0.0                       | 0.0          | 0.0              | 3.7            | Tacke R, Manley JL. EMBO J. 1995; 14; (14) 3540   |
| FXR2         | GACRRR       | 1        |                   |                 |                  | 3.72E-03        | 0.0                       | 0.0          | 0.0              | 2.4            | Ray D et al. Nature. 2013 Jul 11;499(7457):172    |



**Supplementary figure 9: Stress granule RBP motifs are enriched in the 3'UTR of transcripts whose stability is affected in ALS patient derived cells.** AME was used to determine if the 3'UTR of transcripts demonstrating stability changes in ALS fibroblasts (**a**) or iPSCs (**b**) were enriched for motifs recognized by any of 24 RNA binding proteins (RBPs) that (*i*) possess an experimentally-derived sequence recognition motif; (*ii*) exhibit functional or genetic linkage to ALS or FTD; and (*iii*) are involved in stress granule assembly. A full list of these RBPs and their recognition motifs is provided in the Supplementary Methods section. Darker shading corresponds to higher statistical significance, as determined by the Wilcoxon rank-sum test with Bonferroni correction (adjusted p value)



# Supplementary Figure 11

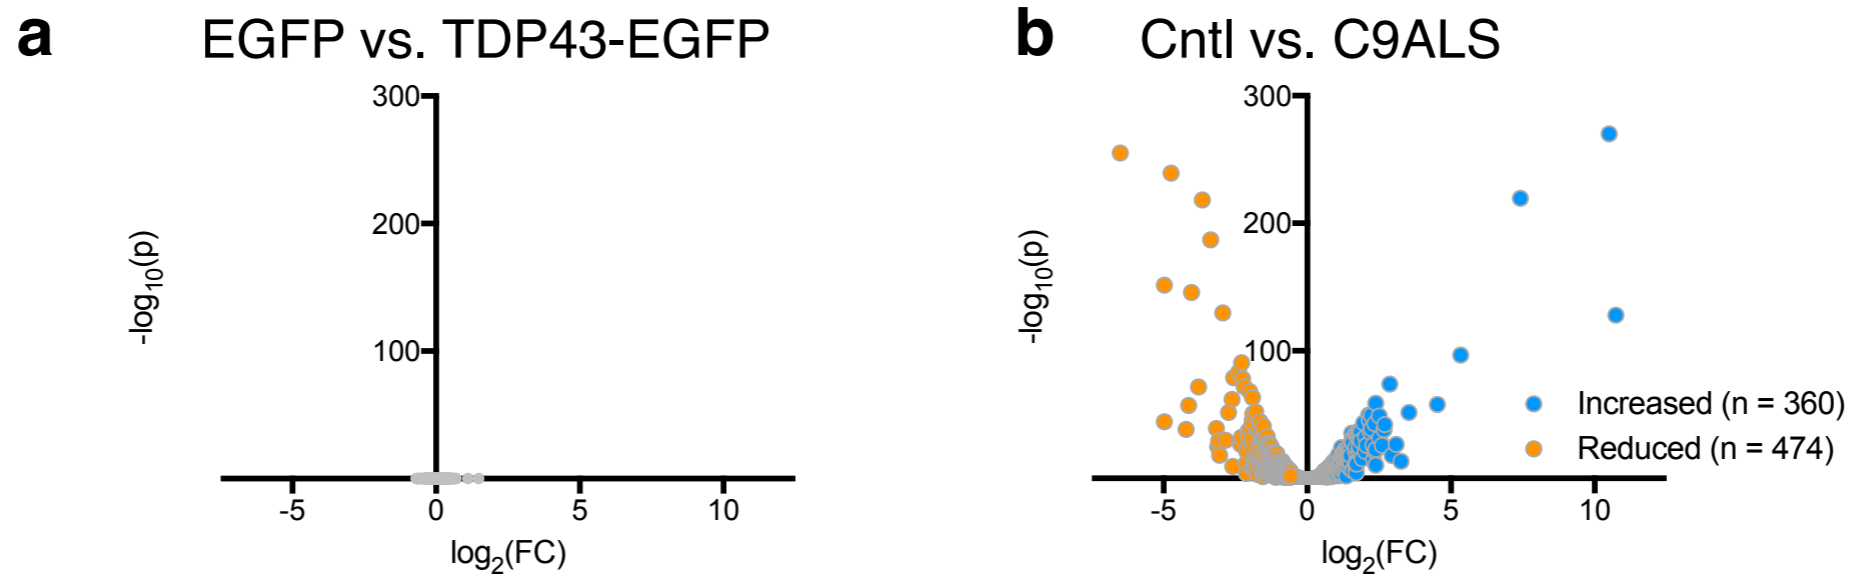

**Supplementary figure 11: TDP43-EGFP overexpression has no detectable effect on RNA synthesis.** **a** No RNAs demonstrated a significant change in synthesis rates in TDP43-EGFP overexpressing iPSCs, in comparison to cells transfected with EGFP, by Bru-seq. **b** As a comparison, volcano plot showing changes in RNA synthesis in C9ALS iPSCs vs. control iPSCs, from Supplementary Fig. 6e

# Supplementary Figure 12

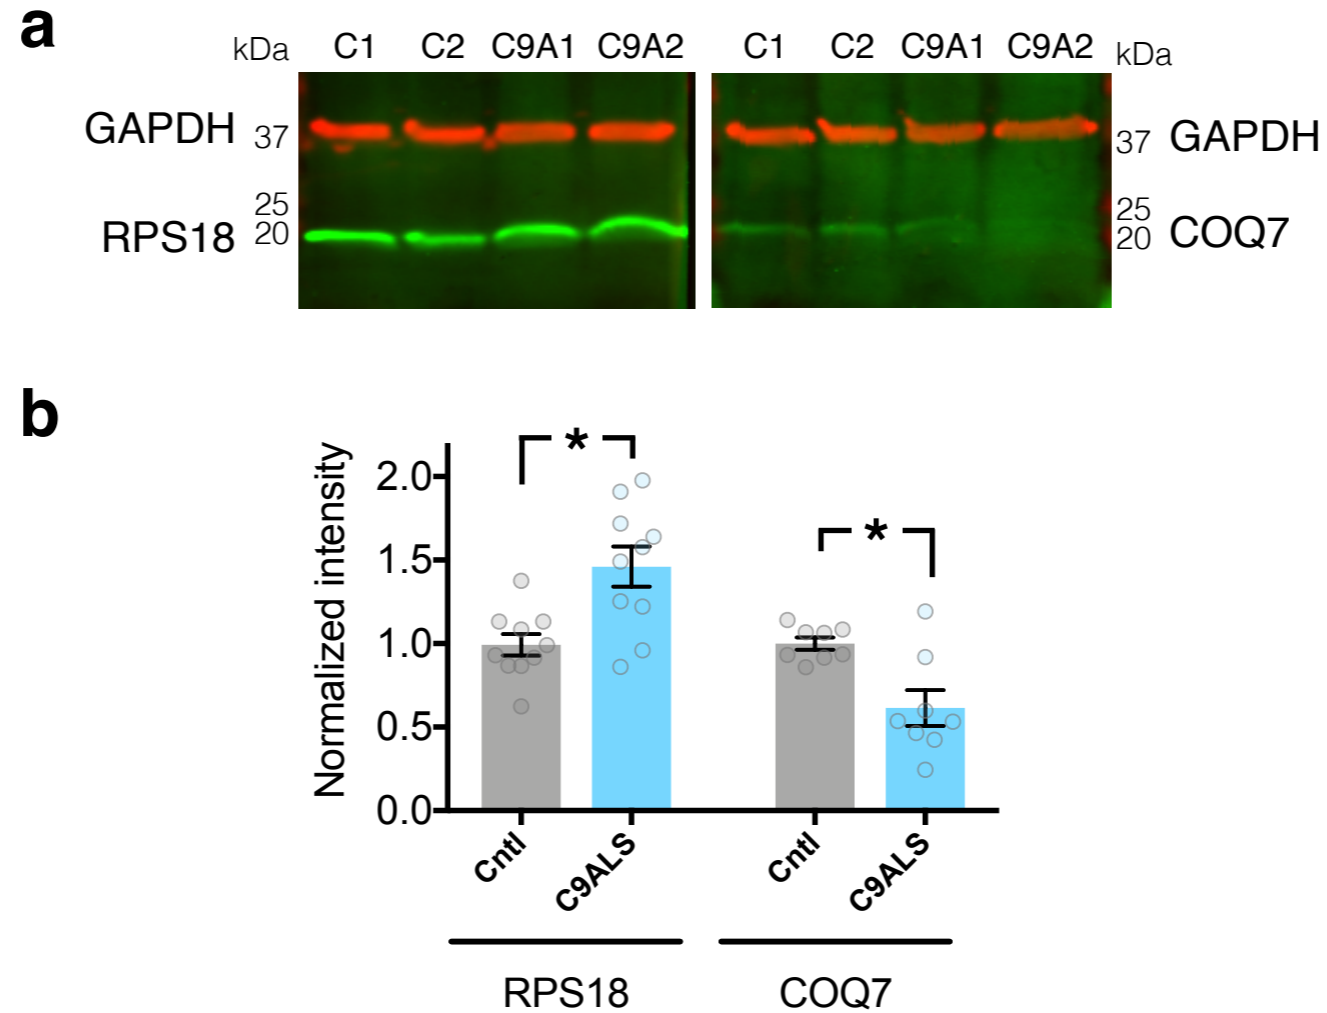

**Supplementary figure 12: Confirmation of changes for select proteins in C9ALS iPSCs.** **a** Representative immunoblots from control (C1, C2) and C9ALS (C9A1, C9A2) iPSCs detected using antibodies recognizing RPS18 and COQ7, components of cytoplasmic ribosomes and the mitochondrial oxidative phosphorylation machinery, respectively. **b** Quantitative abundance of RPS18 and COQ7 in control (Cntl) and C9ALS iPSCs, normalized to values obtained from control iPSCs. Plot shows mean  $\pm$  standard error, determined from 3 biological replicates of 2 iPSC lines per group.

# Supplementary Figure 13

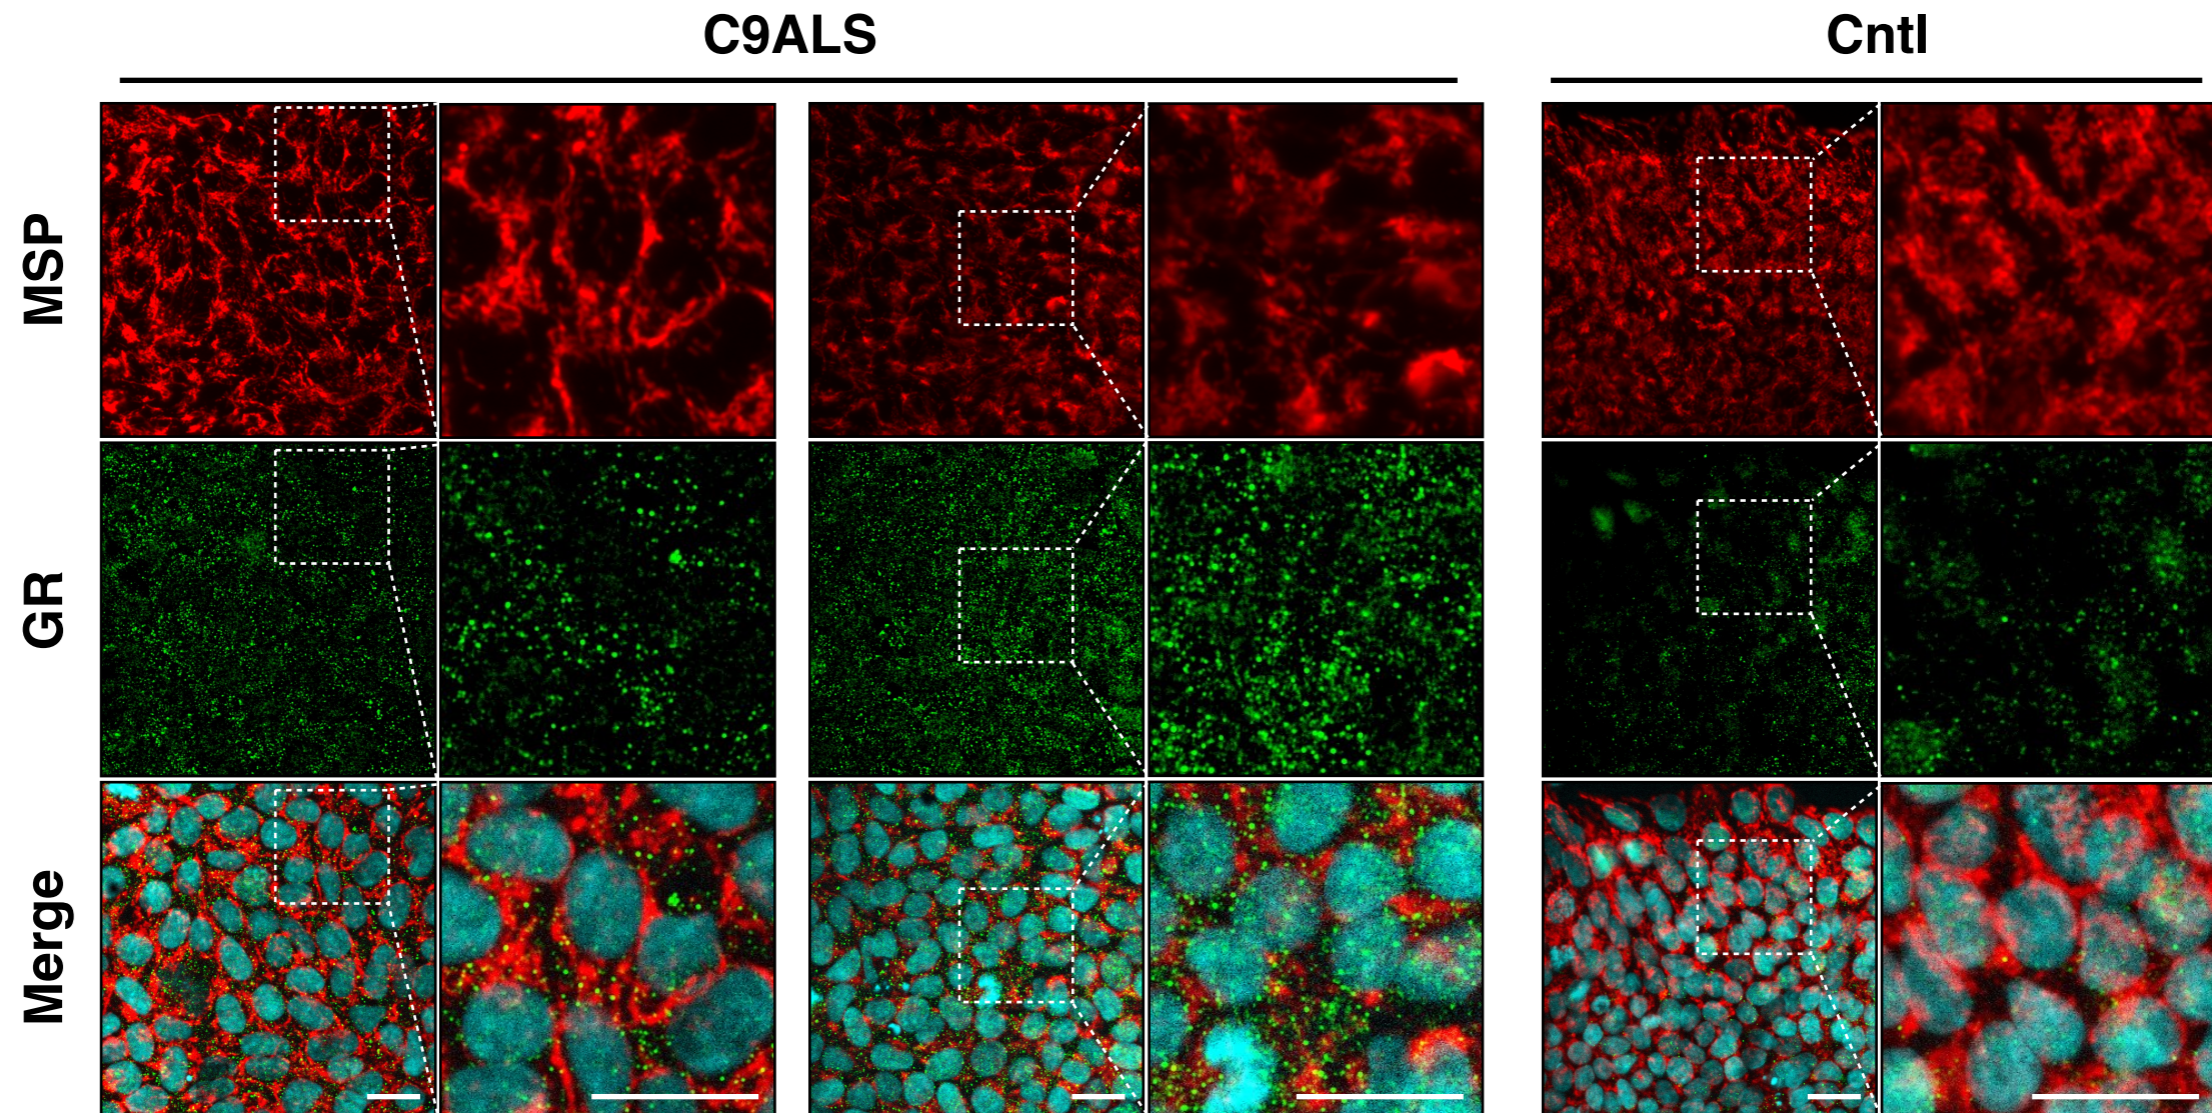

**Supplementary figure 13: Glycine-arginine dipeptide repeat proteins do not colocalize with mitochondria in C9ALS iPSCs.** C9ALS and control (Cntl) iPSCs were stained with antibodies against mitochondrial surface protein (MSP, red) and glycine-arginine (GR, green) dipeptide repeat proteins. All cells were co-stained with DAPI to mark the nuclei (blue). Dotted boxes indicate regions viewed at higher magnification. Scale bar, 50  $\mu\text{m}$

# Supplementary Figure 14

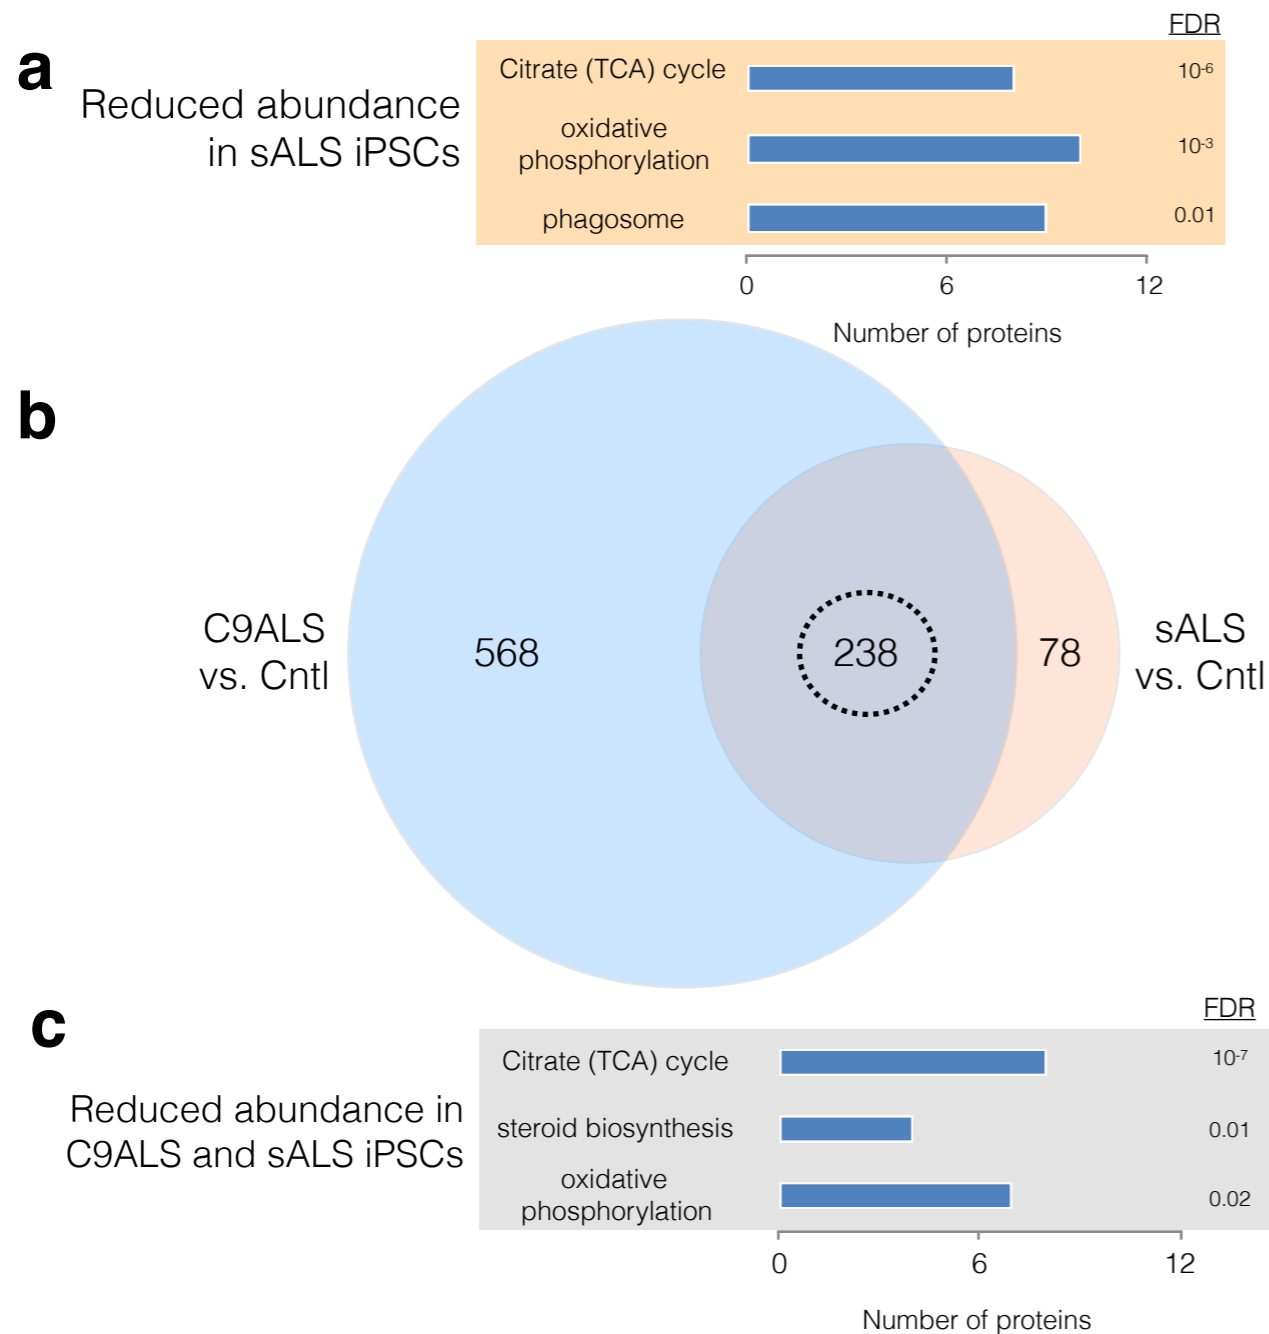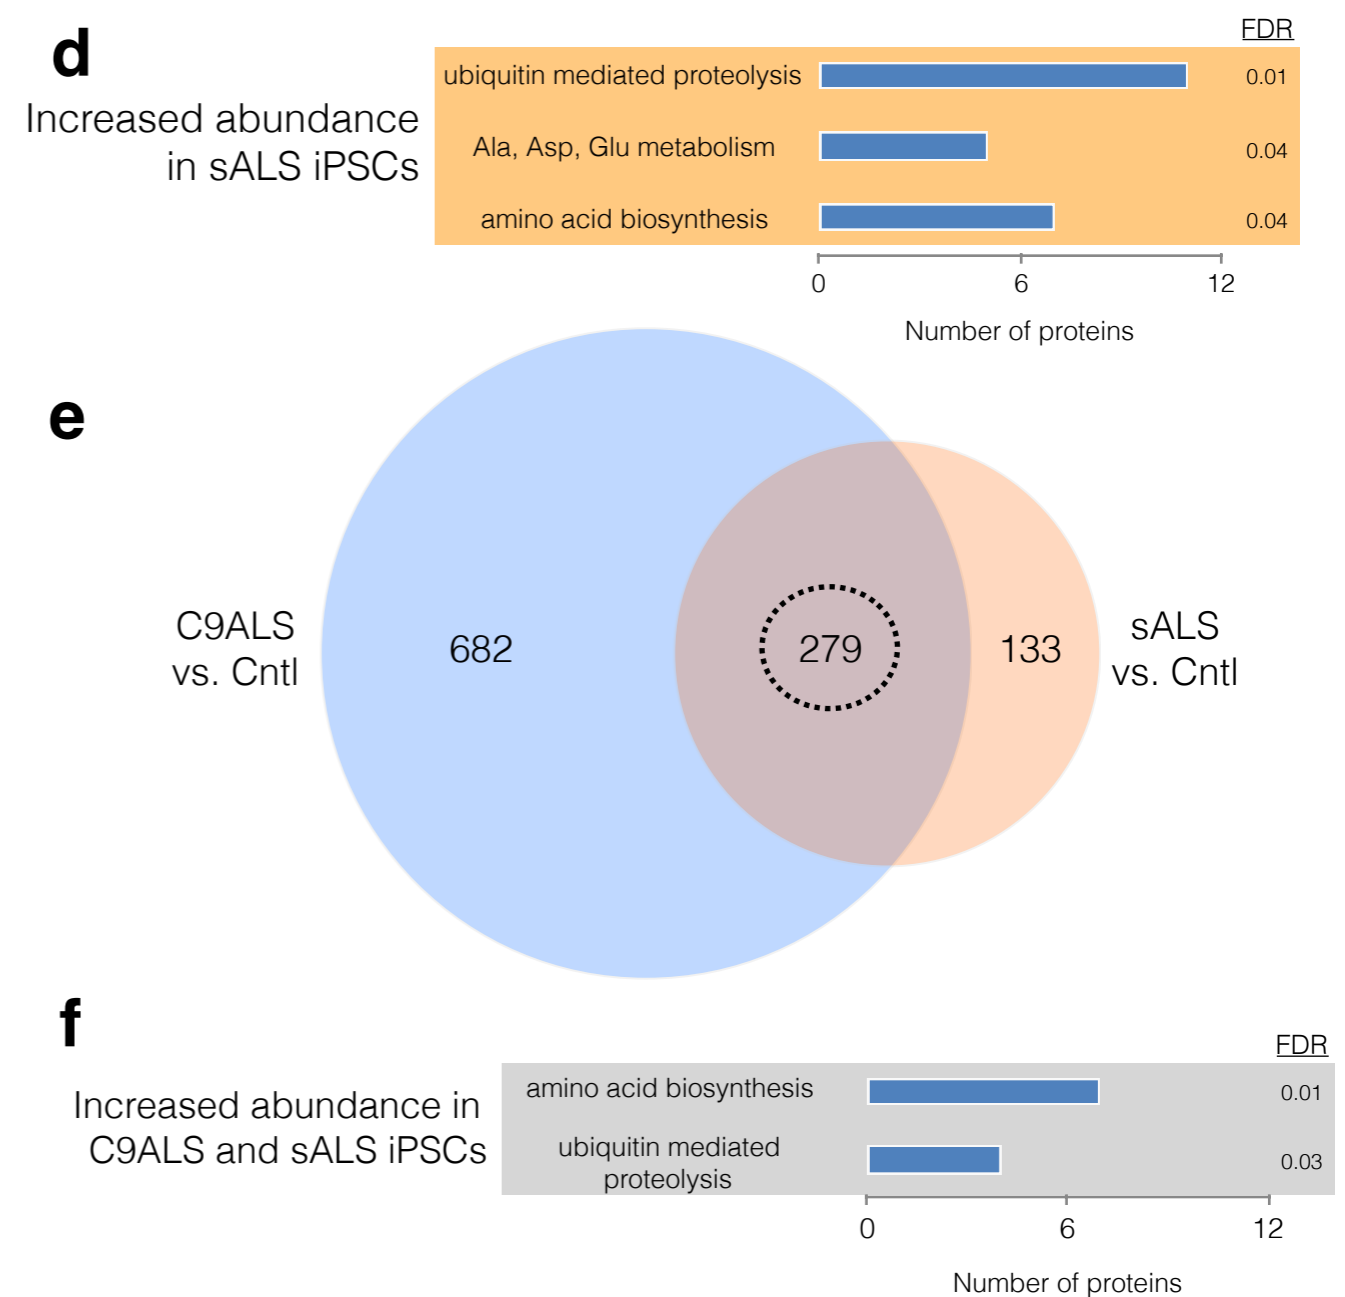

**Supplementary figure 14: Conserved patterns in sALS and C9ALS iPSC proteomics.** **a** Gene ontology for 316 proteins reduced  $\geq 10\%$  in sALS iPSCs, compared to controls. **b** Venn diagram illustrating the overlap among proteins reduced in both C9ALS and sALS iPSCs. The 238 proteins commonly reduced in abundance represent 30% (C9ALS) and 75% (sALS) of reduced proteins. **(c)** Gene ontology for the overlapping 238 proteins in **(b)**, highlighting enrichment in metabolic and oxidative phosphorylation pathways. **d** Gene ontology for 412 proteins increased  $\geq 10\%$  in sALS iPSCs, compared to control (Cntl). **e** Venn diagram showing 279 proteins commonly increased in C9ALS and sALS iPSCs, compared to controls, representing 29% (C9ALS) and 68% (sALS) of increased proteins. **f** Gene ontology for 279 proteins circled in **(e)**, emphasizing enrichment in amino acid biosynthesis and ubiquitin-mediated proteolysis pathways.

# Supplementary Figure 15

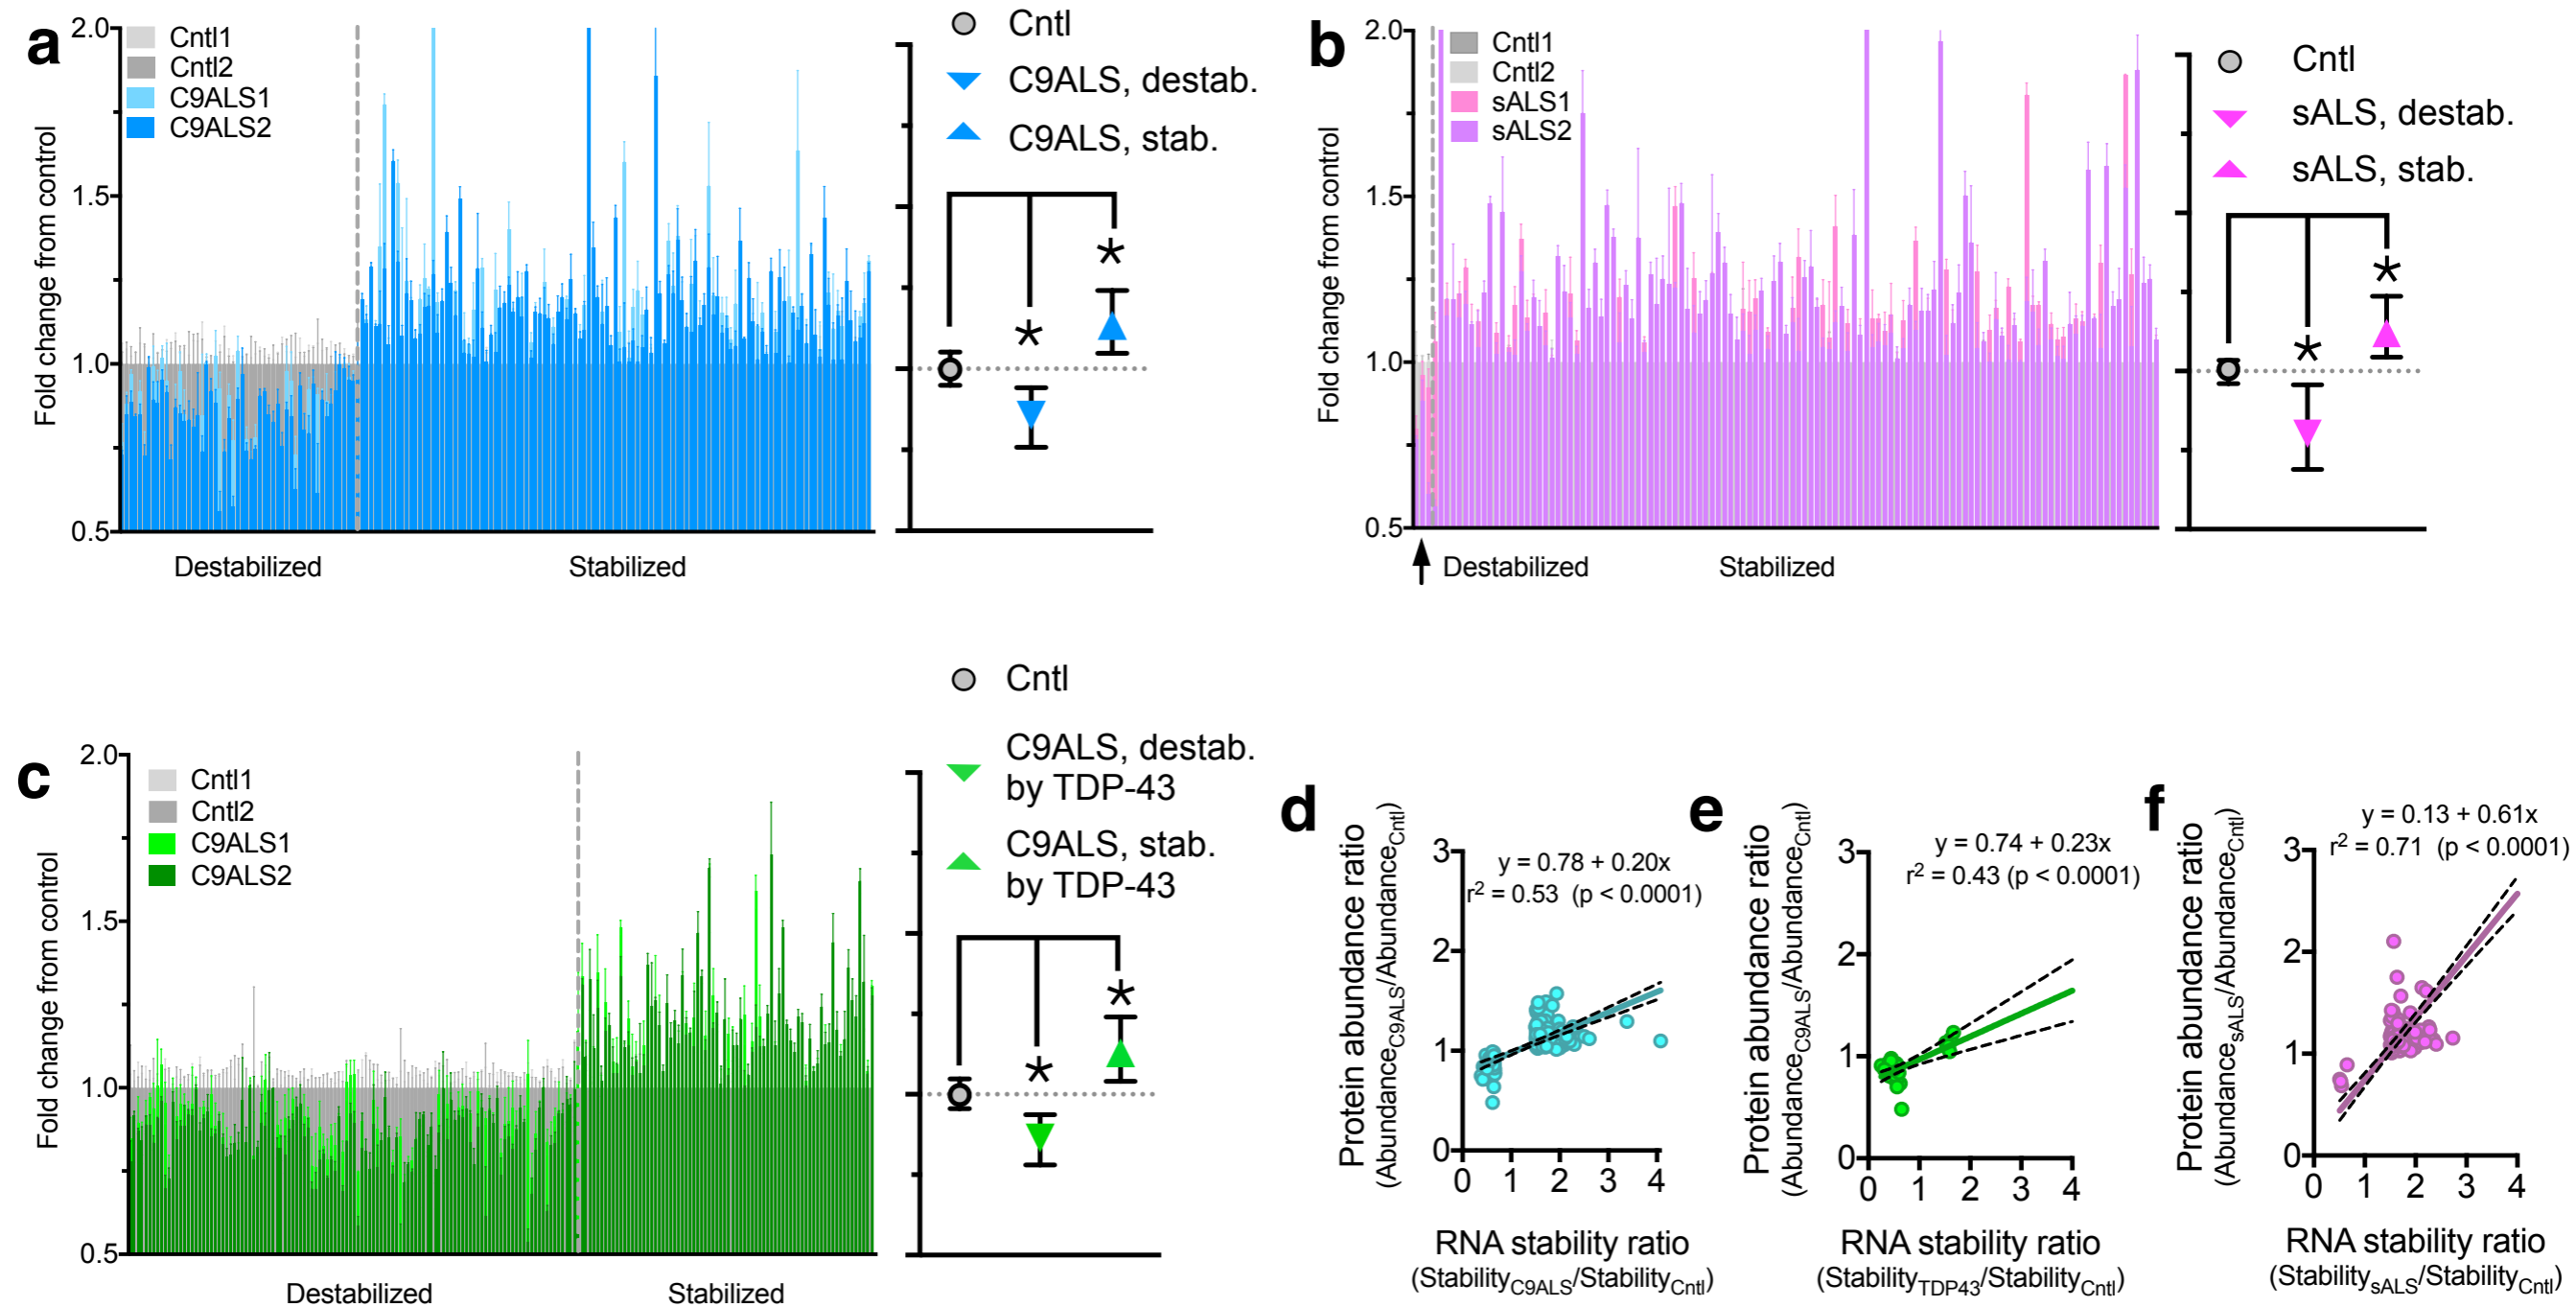

**Supplementary figure 15: Concordant changes in RNA stability and protein abundance in ALS iPSCs.** **a** 170 proteins demonstrated concordant changes in RNA stability and protein abundance in C9ALS iPSCs. **b** In sALS iPSCs, 121 proteins showed concordant changes in RNA stability and protein abundance. **c** 194 proteins exhibited concordant changes in RNA stability in TDP-43 overexpressing iPSCs and protein abundance in C9ALS iPSCs. In each case, the net mean changes in the abundance of these proteins differed significantly from controls (Cntl). \*\*,  $p < 0.001$  two-tailed t-test. \*\*,  $p < 0.001$  two-tailed t-test. **d-f** Linear correlation between RNA stability and protein abundance in C9ALS iPSCs (**d**), RNA stability in TDP43-overexpressing iPSCs and protein abundance in C9ALS iPSCs (**e**), and RNA stability and protein abundance in sALS iPSCs (**f**). Plots to the right of (**a-c**) show mean  $\pm$  standard error, and  $p$  determined by one-way ANOVA with Dunnett's post-test. In (**d-f**),  $p$  determined by the extra sum-of-squares F test. Stab stabilized. Destab destabilized

# Supplementary Figure 16

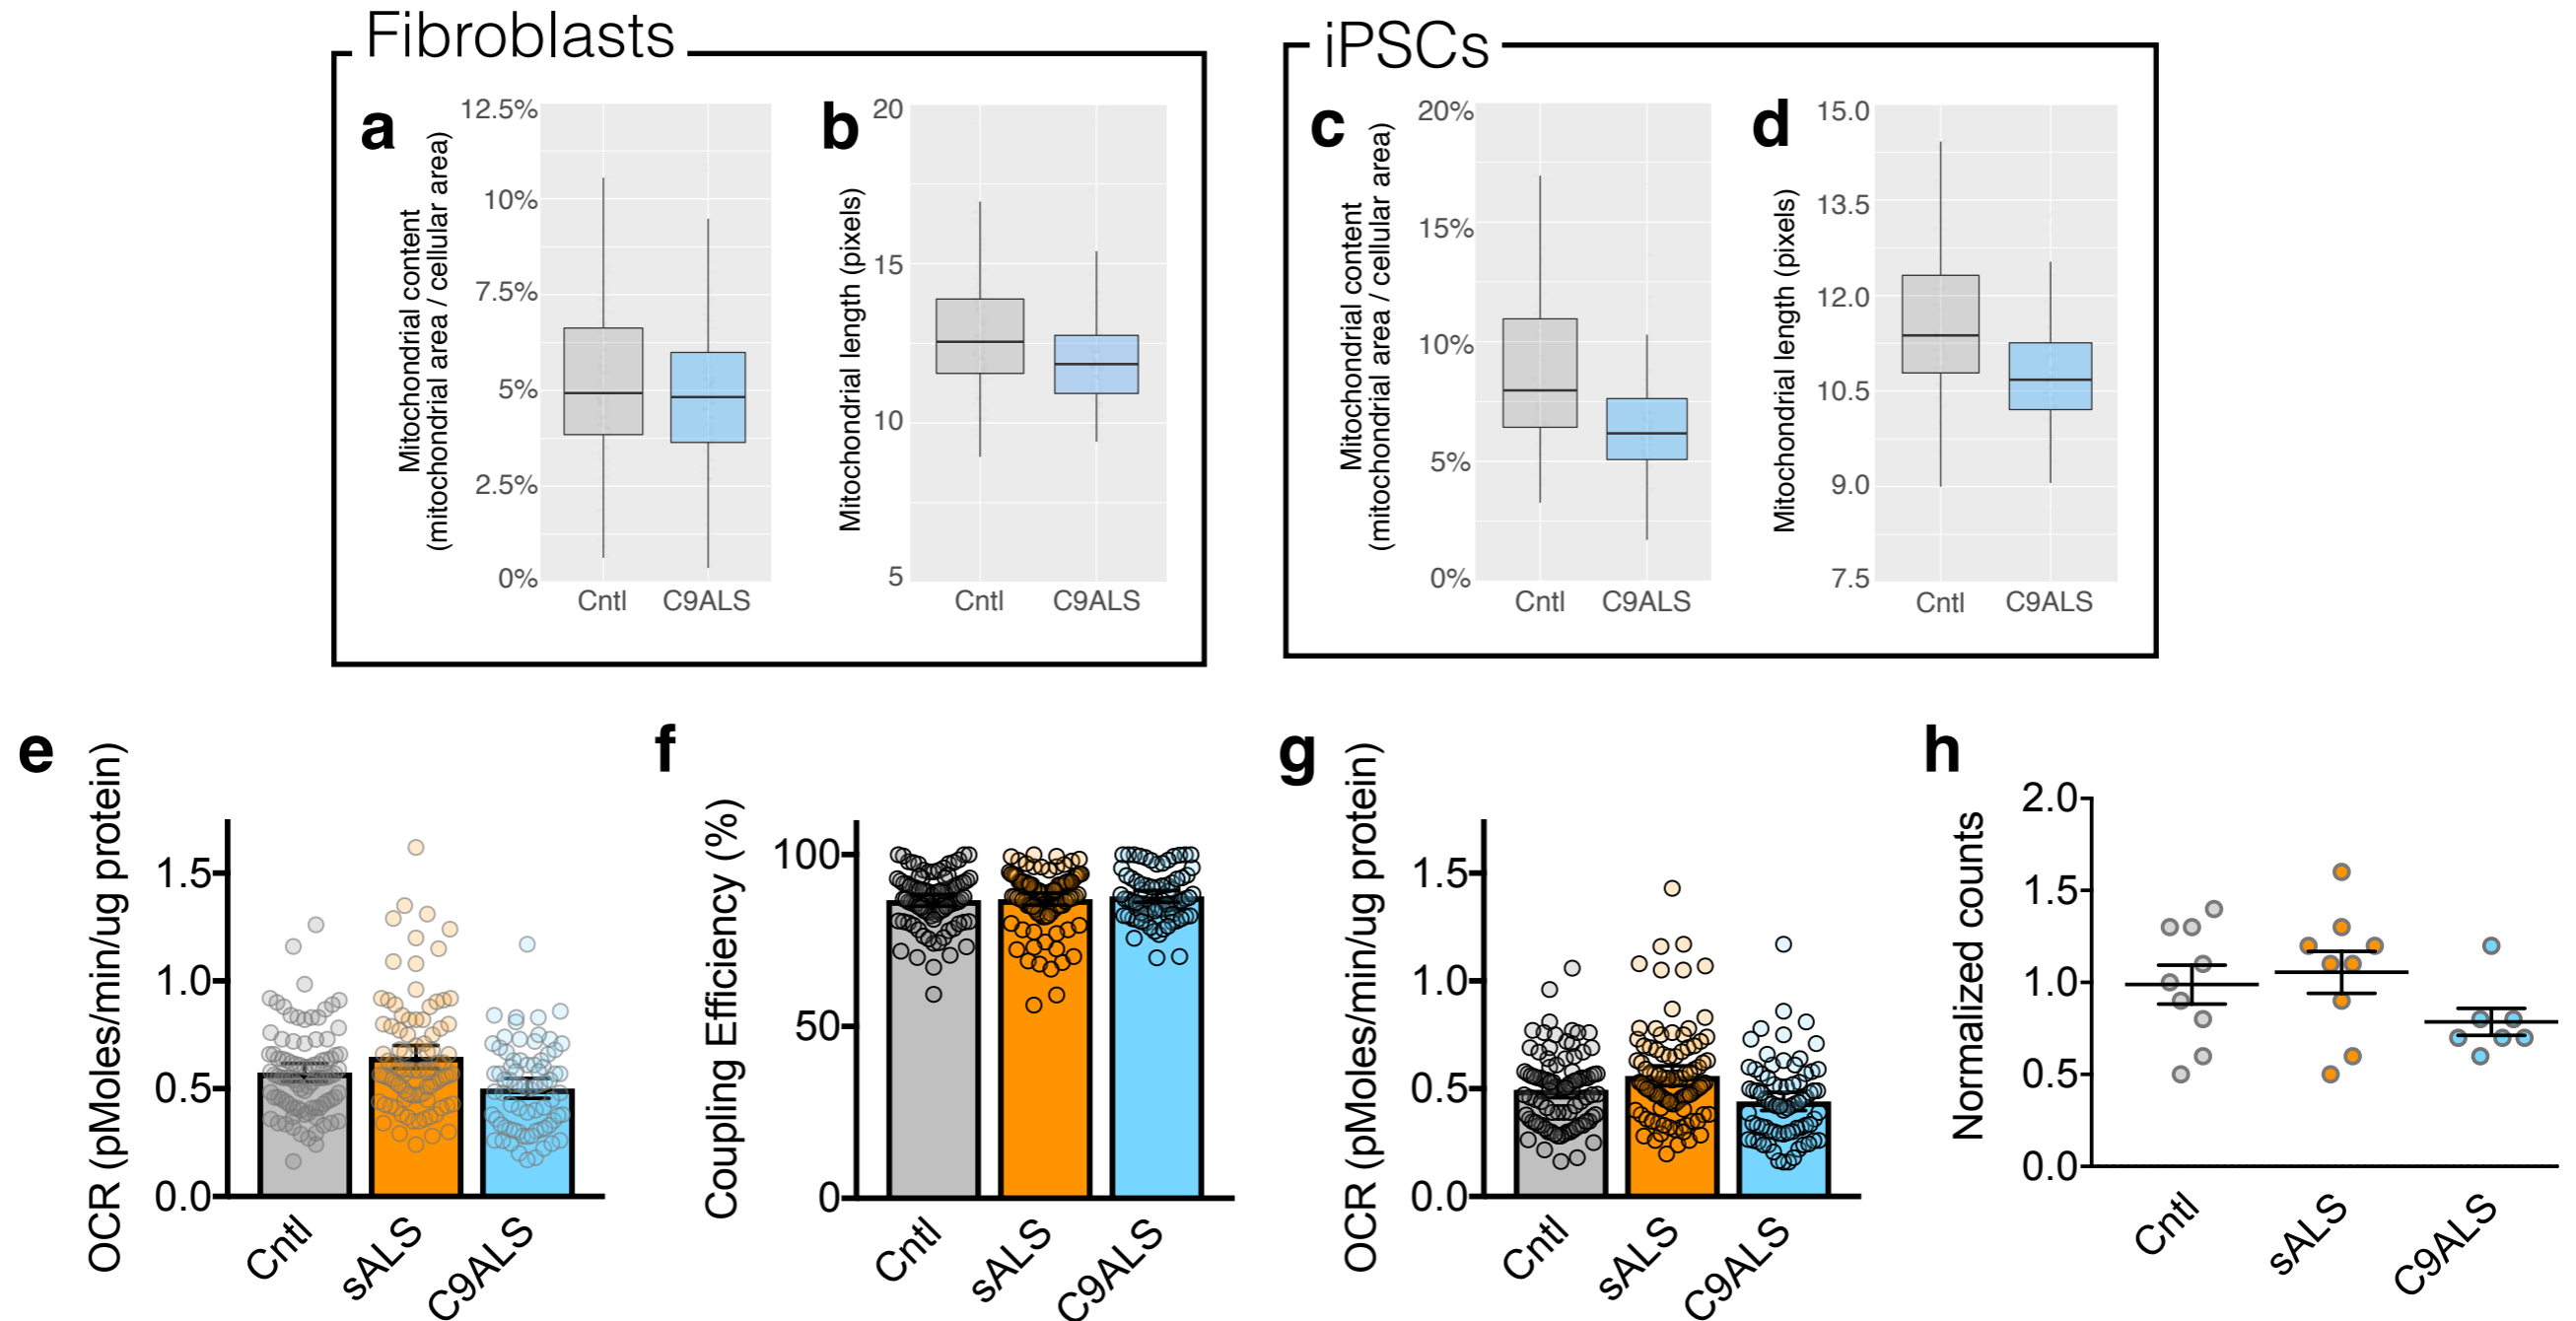

**Supplementary figure 16: Oxidative phosphorylation and protein synthesis in ALS patient-derived cells.** Mitochondrial content (percentage of cell area taken up by mitochondria) and length were no different in control and C9ALS fibroblasts (**a**, **b**) and iPSCs (**c**, **d**). Mitochondrial morphology was assessed in fibroblasts by transduction with mito-GFP, and by application of TMRE dye in iPSCs, as described in the Methods section. Plots in (**a-d**) show median (horizontal line), interquartile range (box) and maximum/minimum (vertical lines). Bioenergetics analyses demonstrated no significant change in mitochondrial oxygen consumption rate (OCR, **e**), coupling efficiency (**f**), or ATP-coupled respiration (**g**) in sALS and C9ALS fibroblasts, in comparison to controls (Cntl).  $n = 8$  (Cntl), 8 (sALS) and 7 (C9ALS) lines per group, as described in Supplementary table 1. Plots in (**e-g**) show mean  $\pm$  standard error. **h** Rates of protein translation, as measured by SUnSET, were not significantly different from one another in control, C9ALS and sALS fibroblasts. Plot shows normalized anti-puromycin counts (mean  $\pm$  standard error) from 2 lines of each group, performed in triplicate



# Supplementary Figure 17

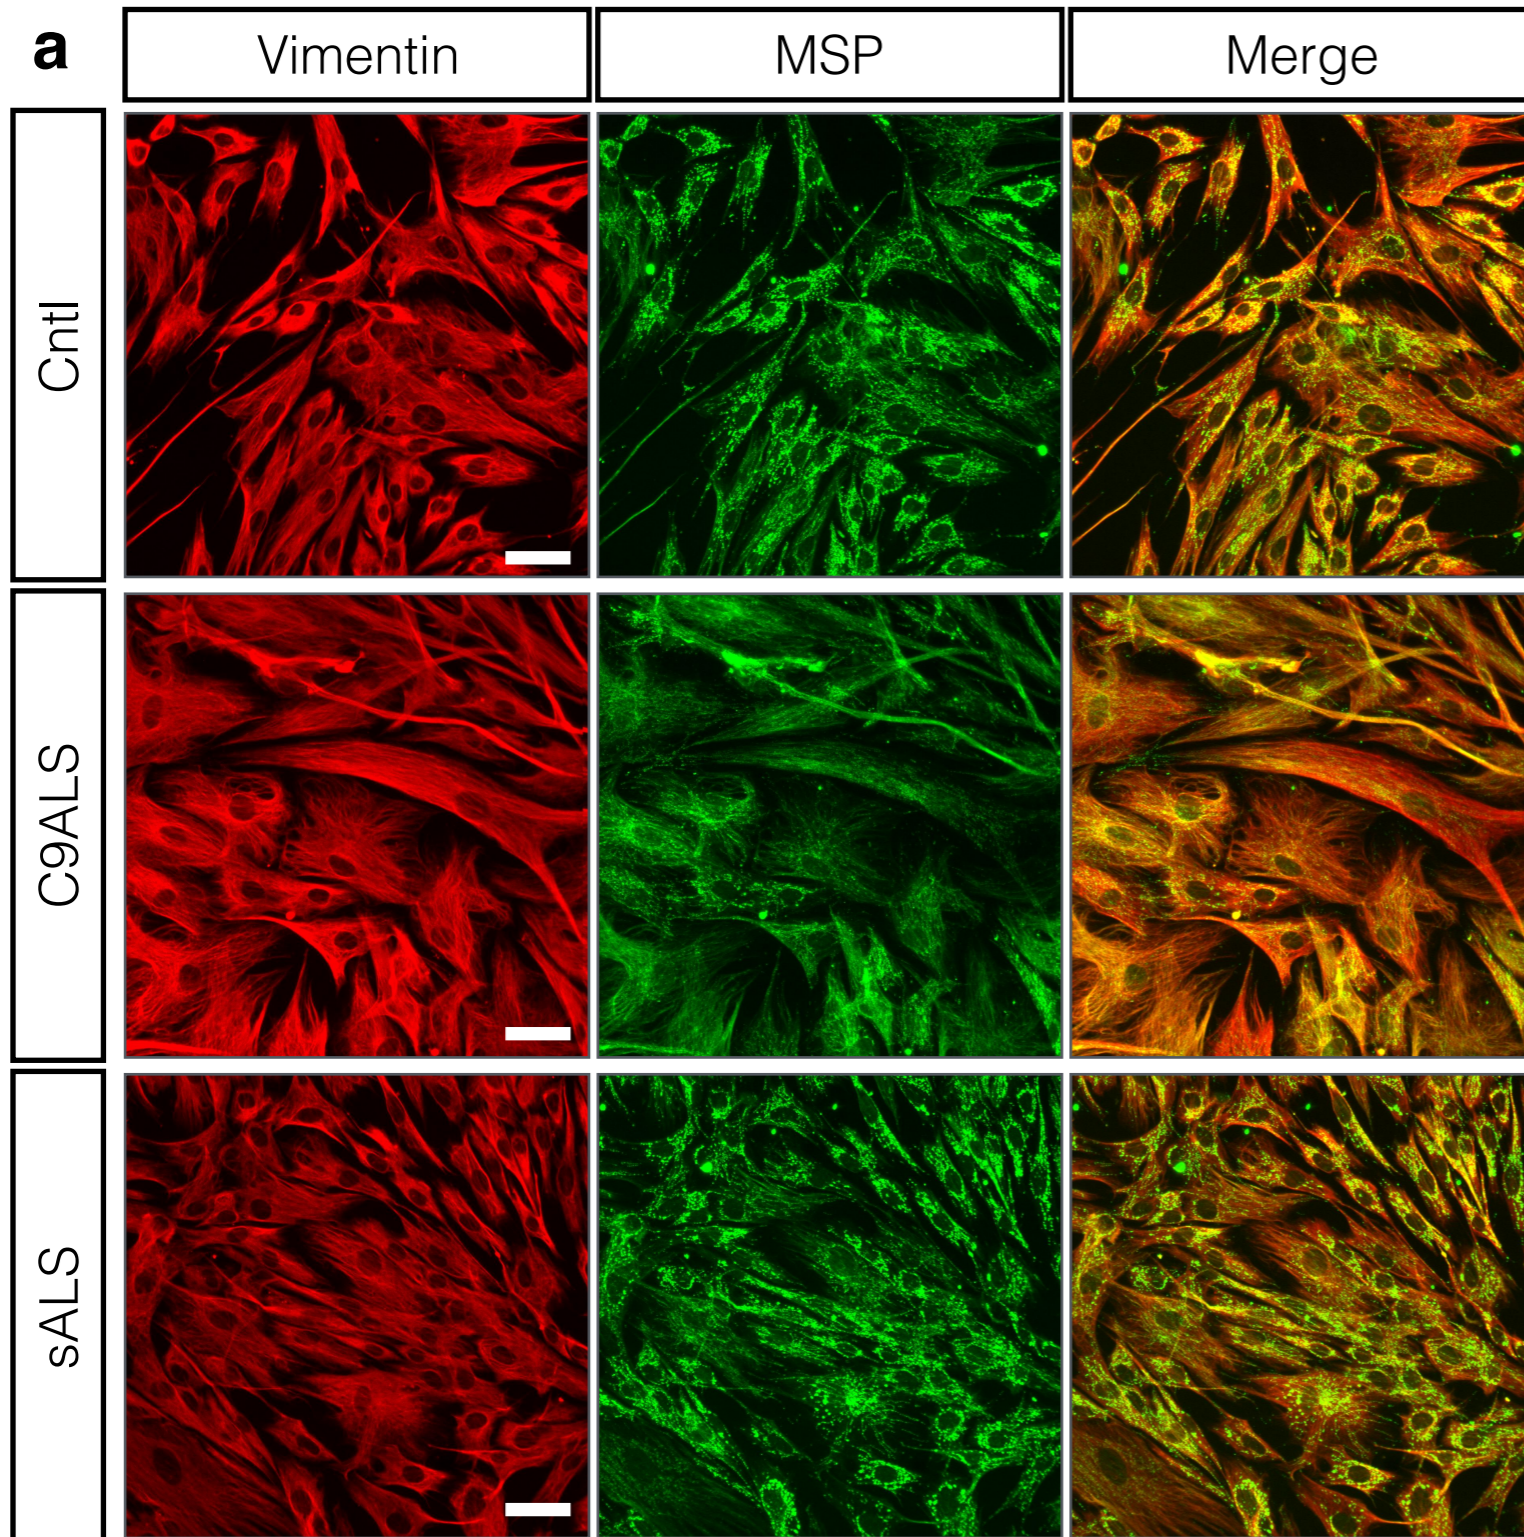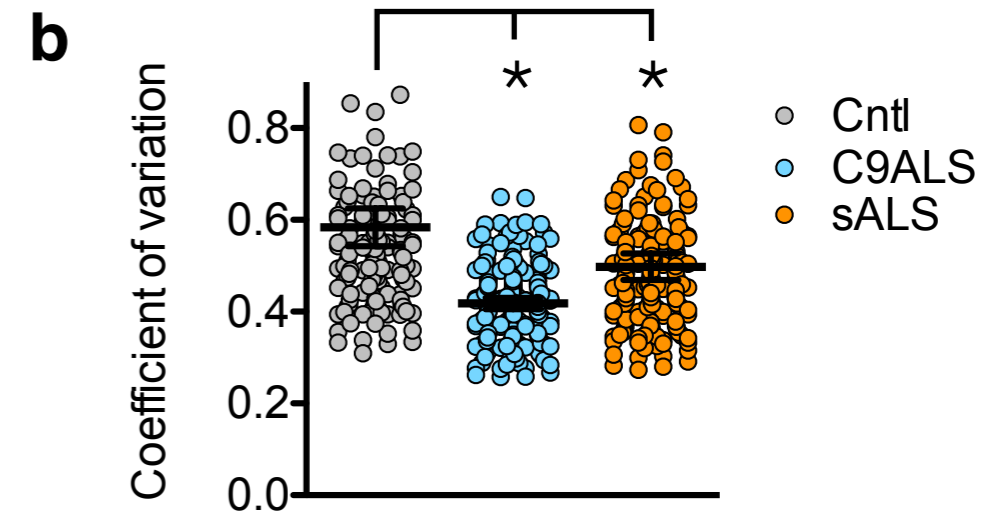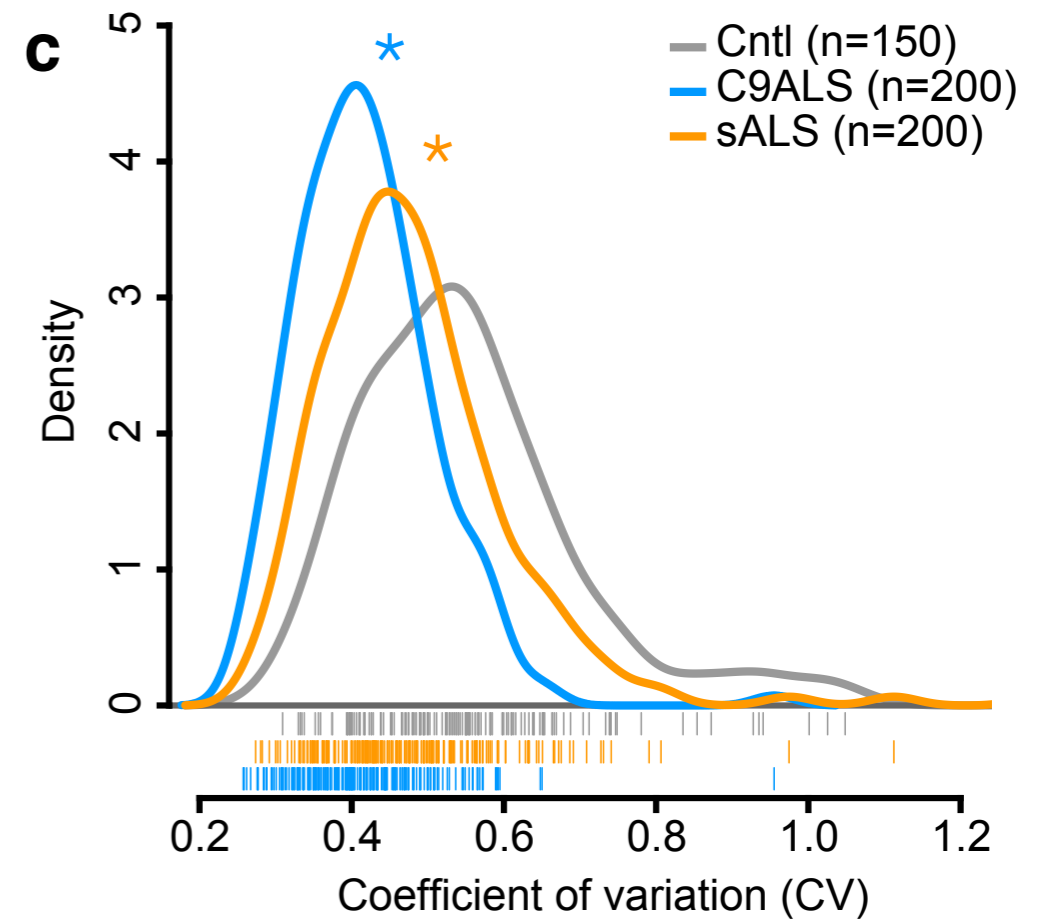

**Supplementary figure 17: Mitochondrial morphology in fixed ALS fibroblasts.** **a** Immunocytochemistry for vimentin and mitochondrial surface protein (MSP) in fibroblasts, demonstrating linear rather than punctate mitochondria in C9ALS cells. Scale bar, 50  $\mu\text{m}$ . **b** The coefficient of variation of mitochondrial staining, a measure of granularity, was significantly reduced in C9ALS and sALS fibroblasts. \*,  $p < 0.0001$ , one-way ANOVA with Dunnett's test. **c** Density plot of mitochondrial coefficient of variation, demonstrating significantly left-shifted distributions for C9ALS and sALS fibroblasts. \*,  $p < 0.0001$ , Kolmogorov-Smirnov test. Observations collected from 150 cells (Cntl) or 200 cells (sALS, C9ALS) per genotype, combined from 12 separate lines of fibroblasts (4 Cntl, 4 sALS, and 4 C9ALS)

# Supplementary Figure 18

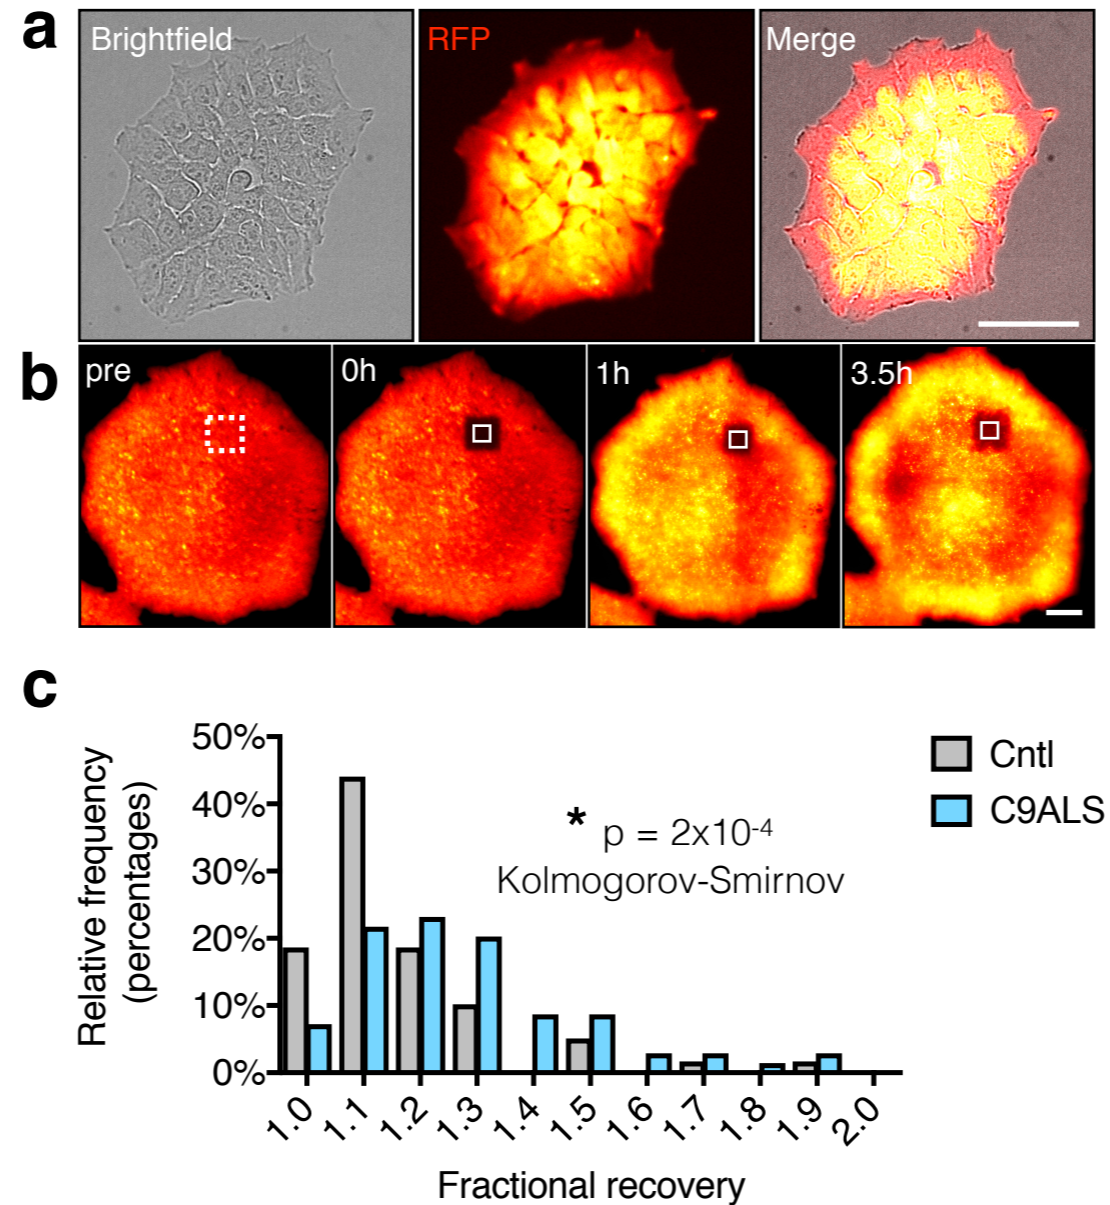

**Supplementary figure 18: Recovery of fluorescence after photo-bleaching iPSCs expressing mCherry.** **a** Baseline red fluorescence signal in iPSCs. **b** A small region within an iPSC colony was selected for photobleaching (dotted box). Fluorescence recovery measured within a smaller area, delimited by the solid white box. Scale bars, 100  $\mu\text{m}$ . **c** Histogram of fractional recovery rates, demonstrating faster recovery in C9ALS iPSCs. Observations collected from 3 biological replicates of 2 iPSC lines per genotype
